# Supplementary material for: AlCl3-promoted [3 + 2] annulation of cis-2,3-disubstituted cyclopropane 1,1-diesters with isothiocyanates: stereoselective synthesis of densely substituted 2-iminodihydrothiophenes
Source: Royal Society of Chemistry journal article supplement (doi:10.1039/c3ob41678j), 2013-01-01
Supplement: c3ob41678j.pdf [file c3ob41678j.pdf]

# **Electronic Supplementary Information**

*for*

## **AlCl<sub>3</sub>-promoted [3 + 2] annulation of *cis*-2,3-disubstituted cyclopropane 1,1-diesters with isothiocyanates: stereoselective synthesis of densely substituted 2-iminodihydrothiophenes**

*Yongxian Sun, Gaosheng Yang,\* Zhuo Chai,\* Xiaolong Mu, and Jun Chai*

Key Laboratory of Functionalized Molecular Solids, Ministry of Education, Anhui key Laboratory of  
Molecule-Based Materials, Institute of Organic Chemistry, College of Chemistry and Materials Science,  
Anhui Normal University, Wuhu, 241000, China

gshyang@mail.ahnu.edu.cn; chaizhuo@mail.ahnu.edu.cn

### **Content**

|                                                                  |         |
|------------------------------------------------------------------|---------|
| <sup>1</sup> H, <sup>13</sup> C NMR Spectra of all products..... | S2–S39  |
| X-ray crystallographic analysis of <b>3ck</b> .....              | S40–S41 |

# <sup>1</sup>H, <sup>13</sup>C NMR Spectra of all products

## Compound 3aa

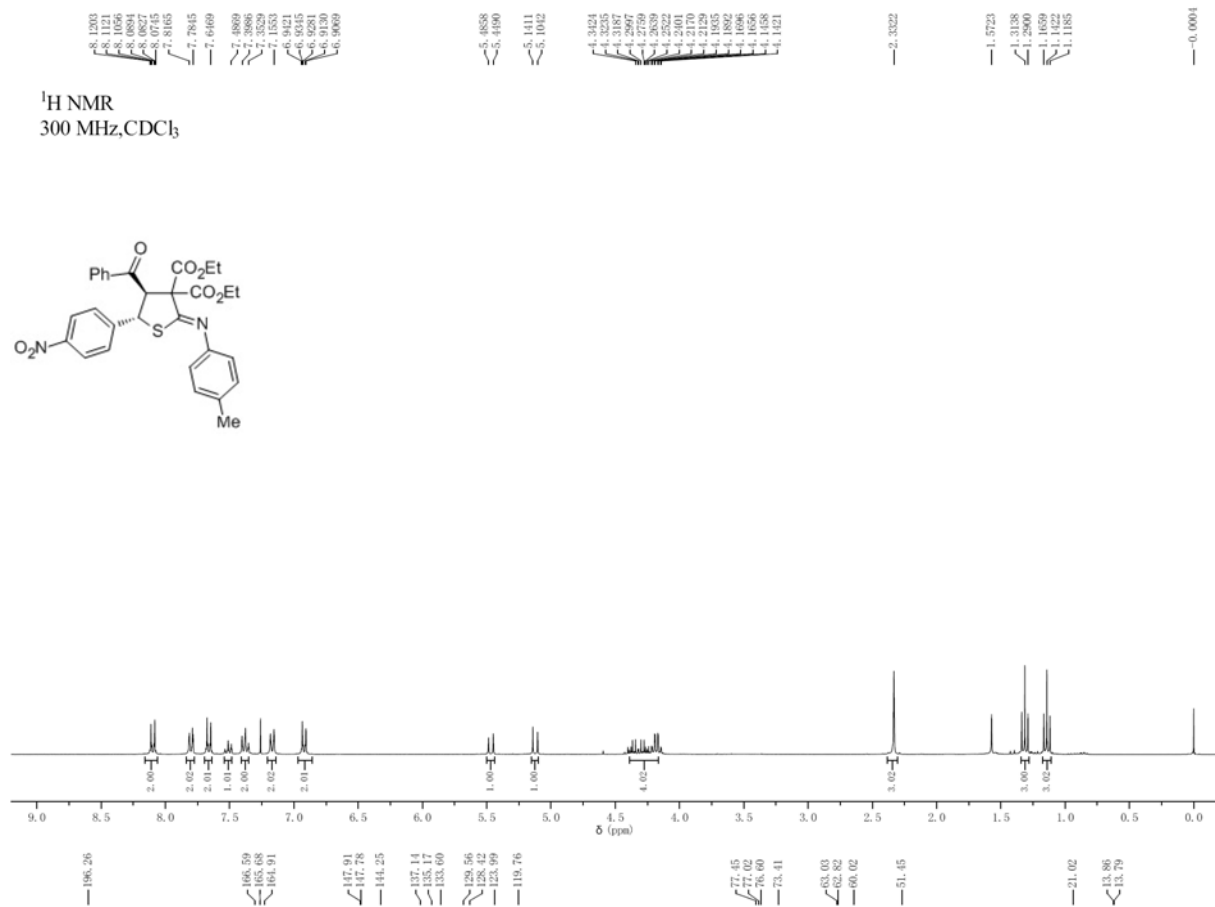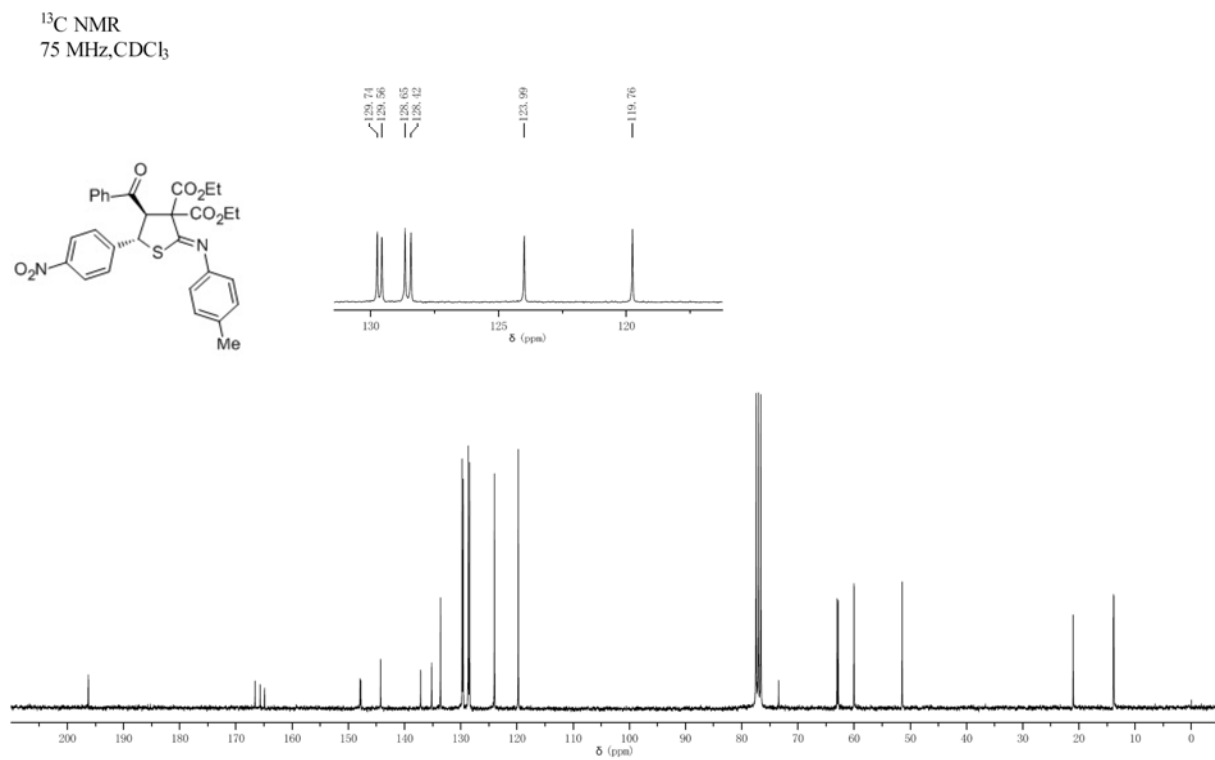





### Compound 3ad

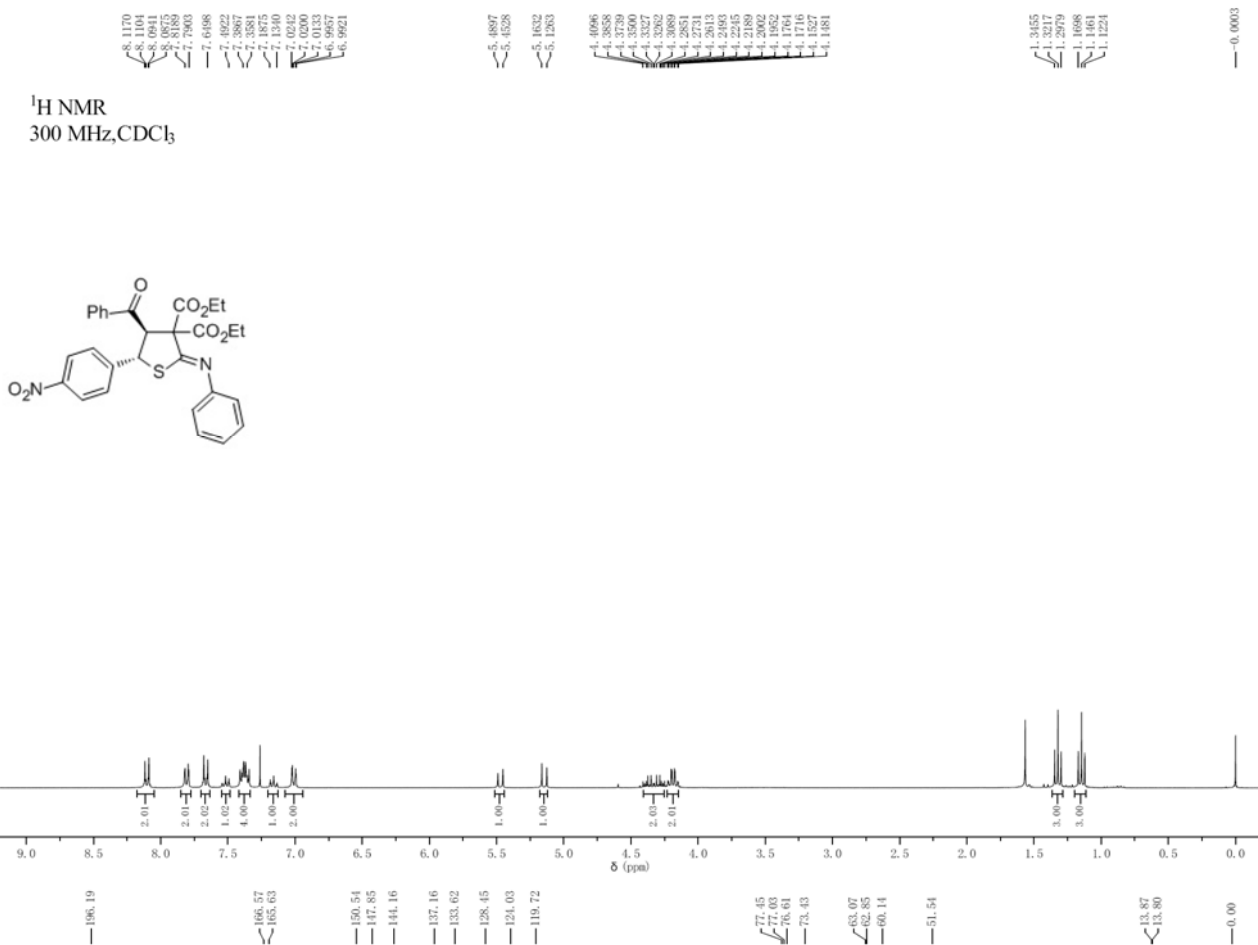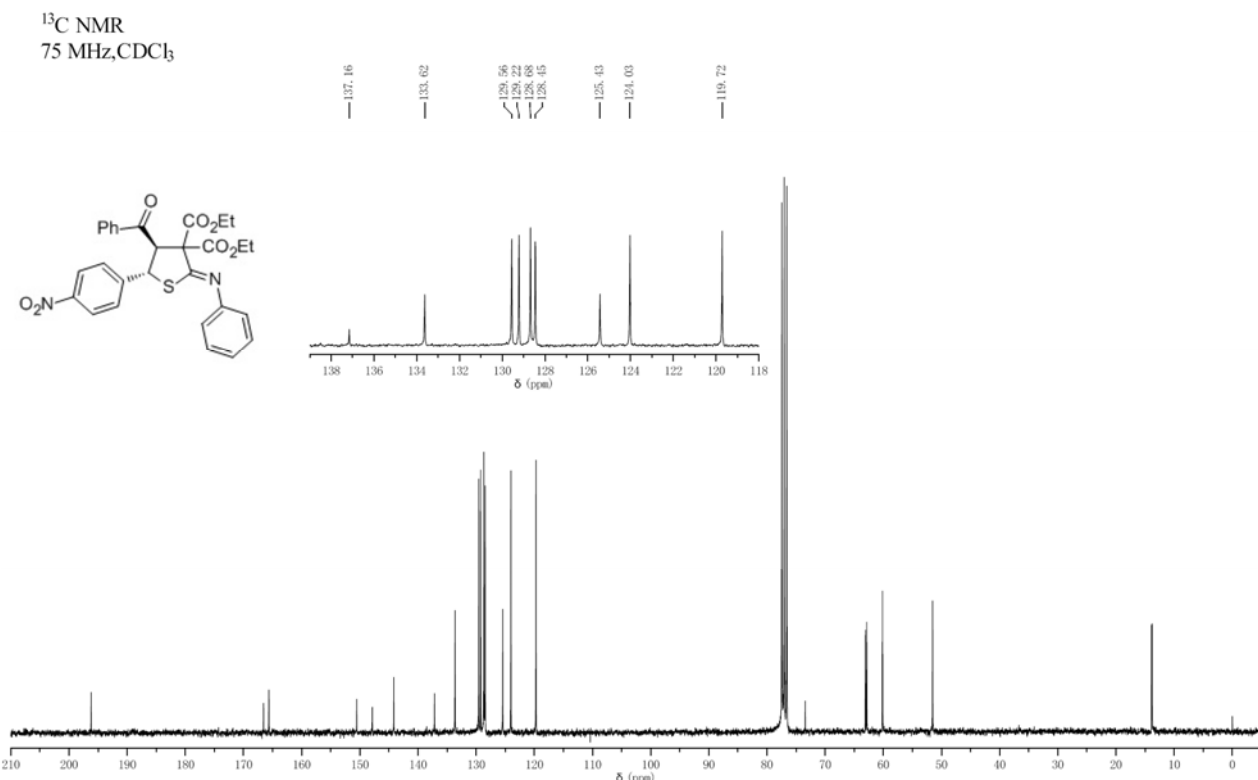

### Compound 3ae

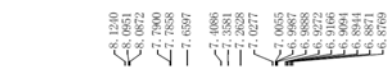

<sup>1</sup>H NMR  
 300 MHz, CDCl<sub>3</sub>

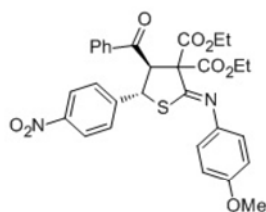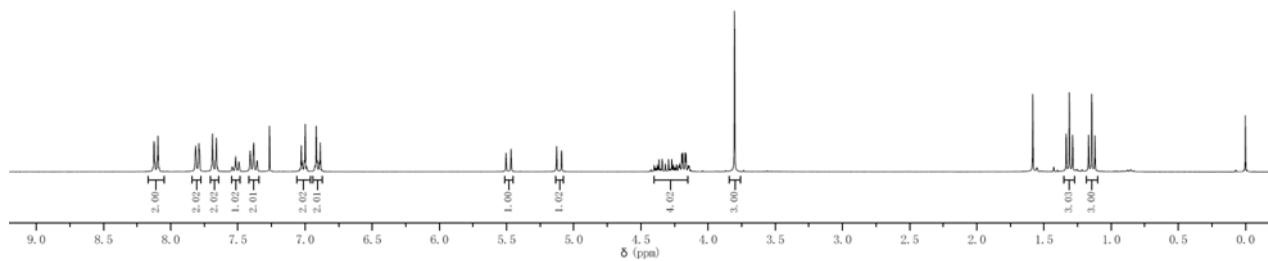

<sup>13</sup>C NMR  
 75 MHz, CDCl<sub>3</sub>

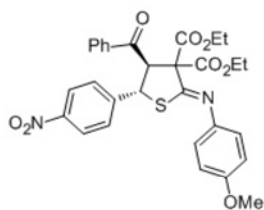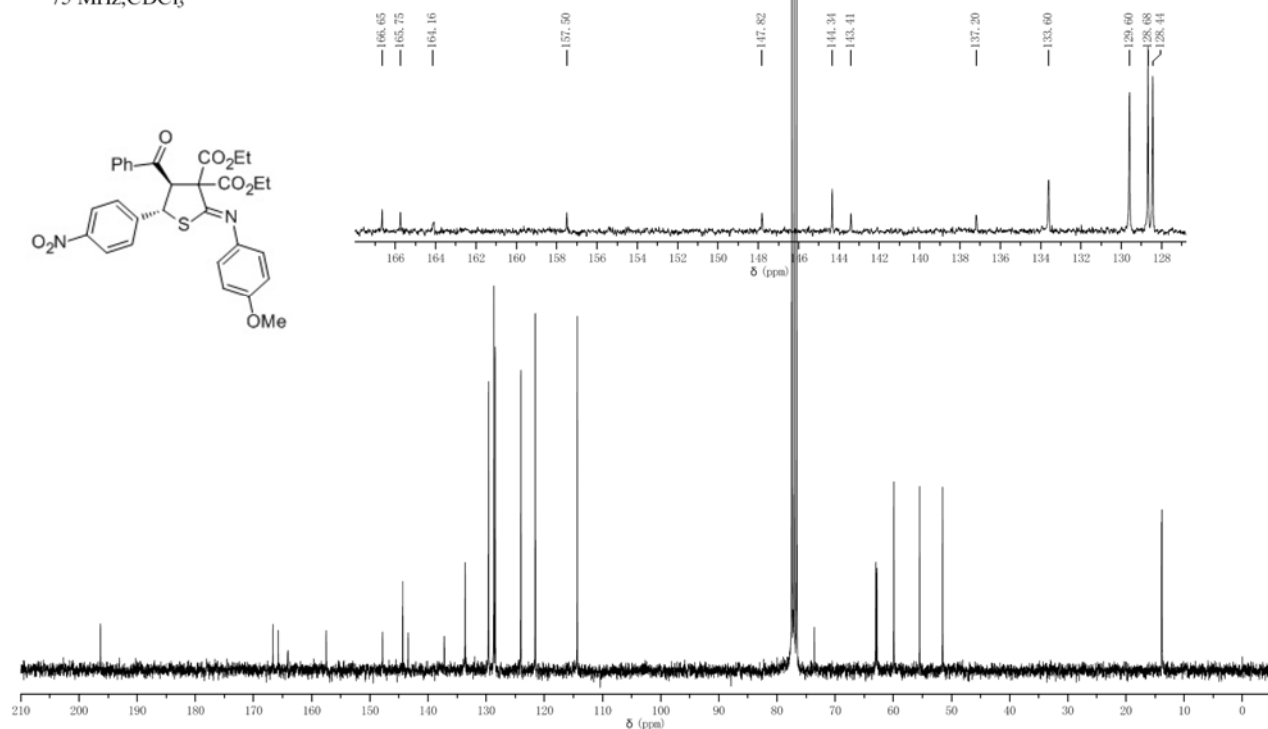

### Compound 3af

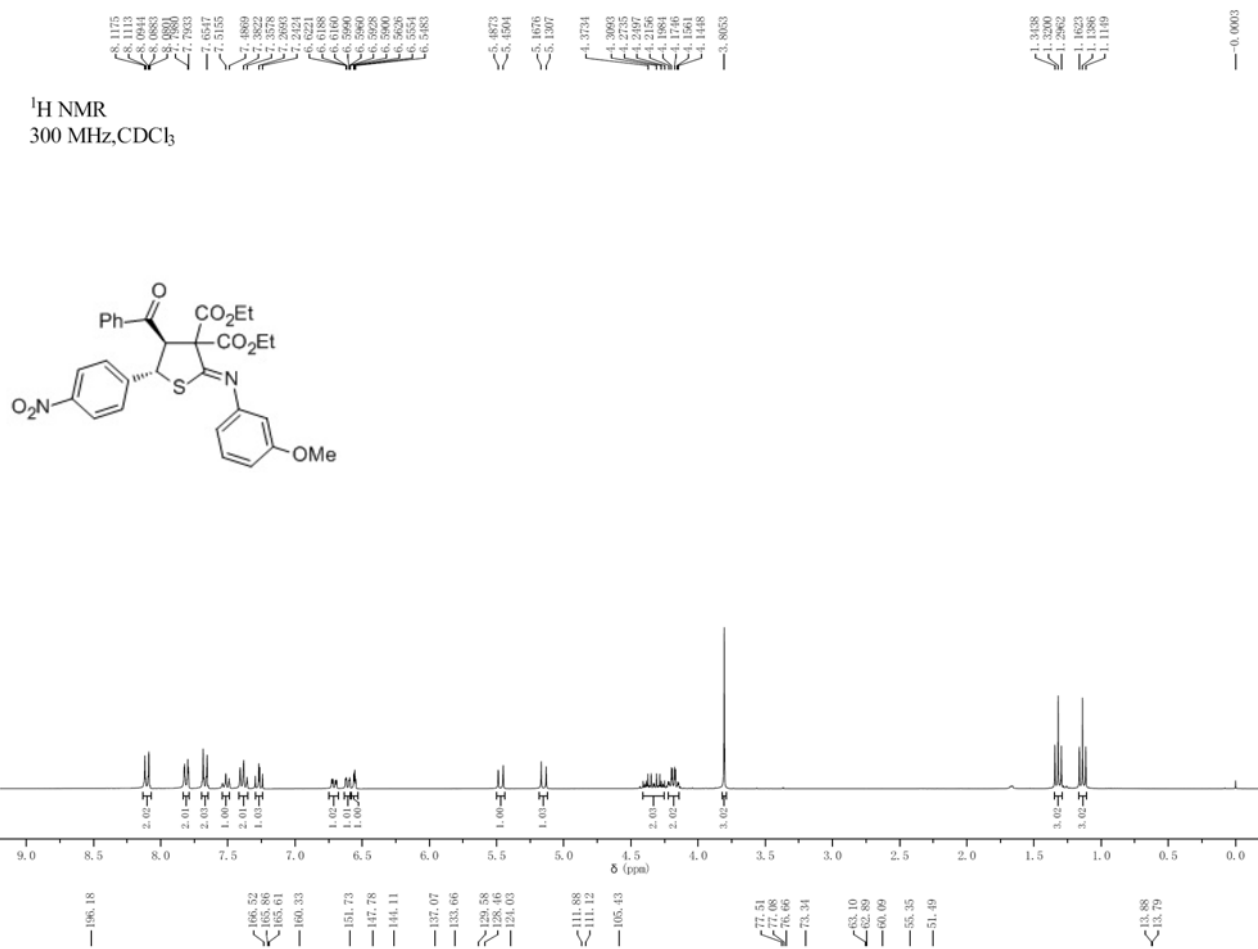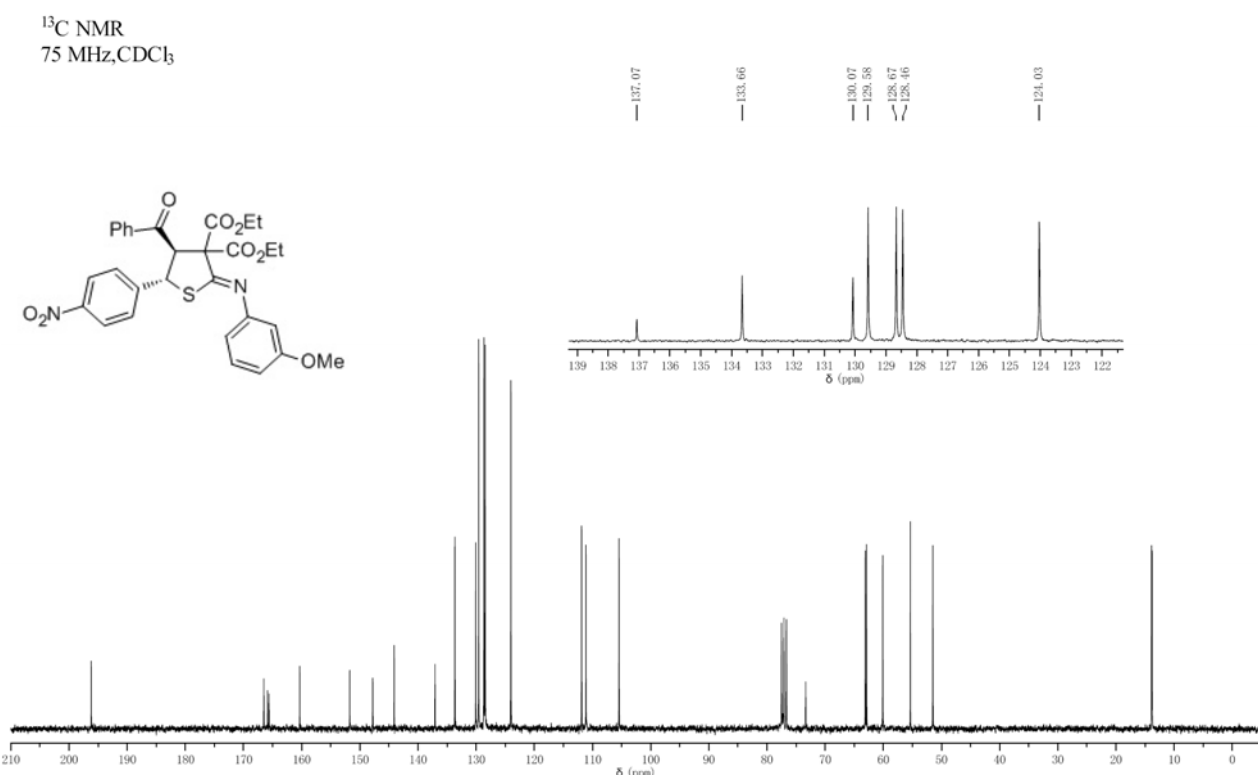

### Compound 3ag

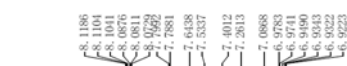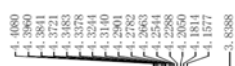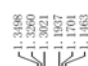

<sup>1</sup>H NMR  
 300 MHz, CDCl<sub>3</sub>

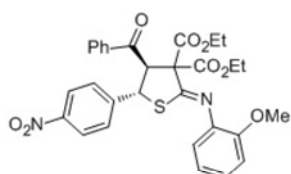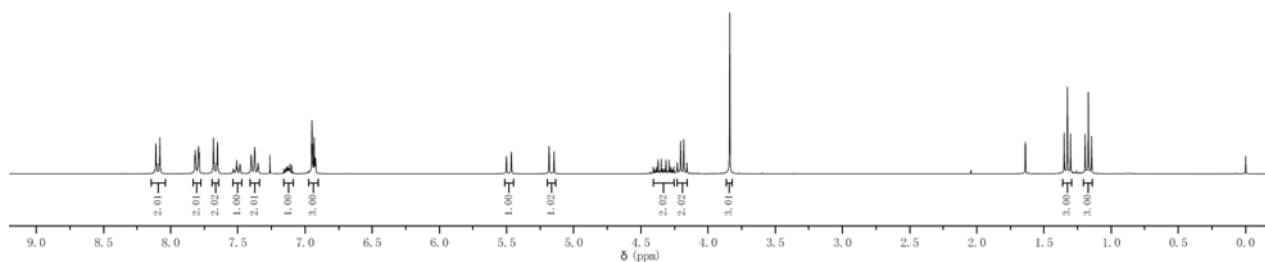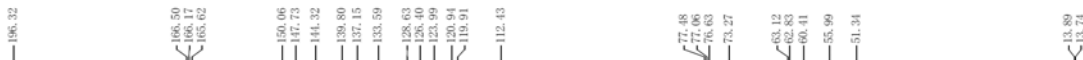

<sup>13</sup>C NMR  
 75 MHz, CDCl<sub>3</sub>

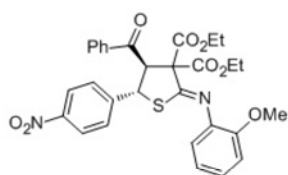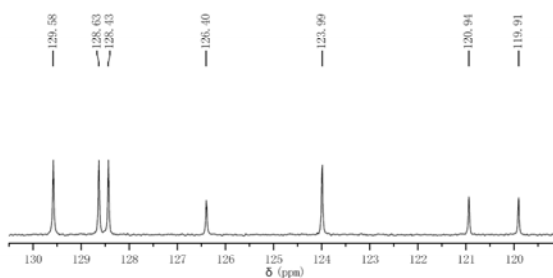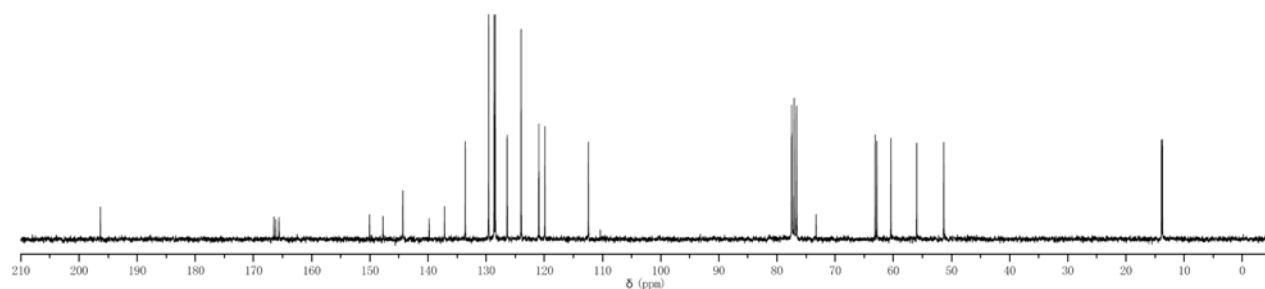



### Compound 3ah

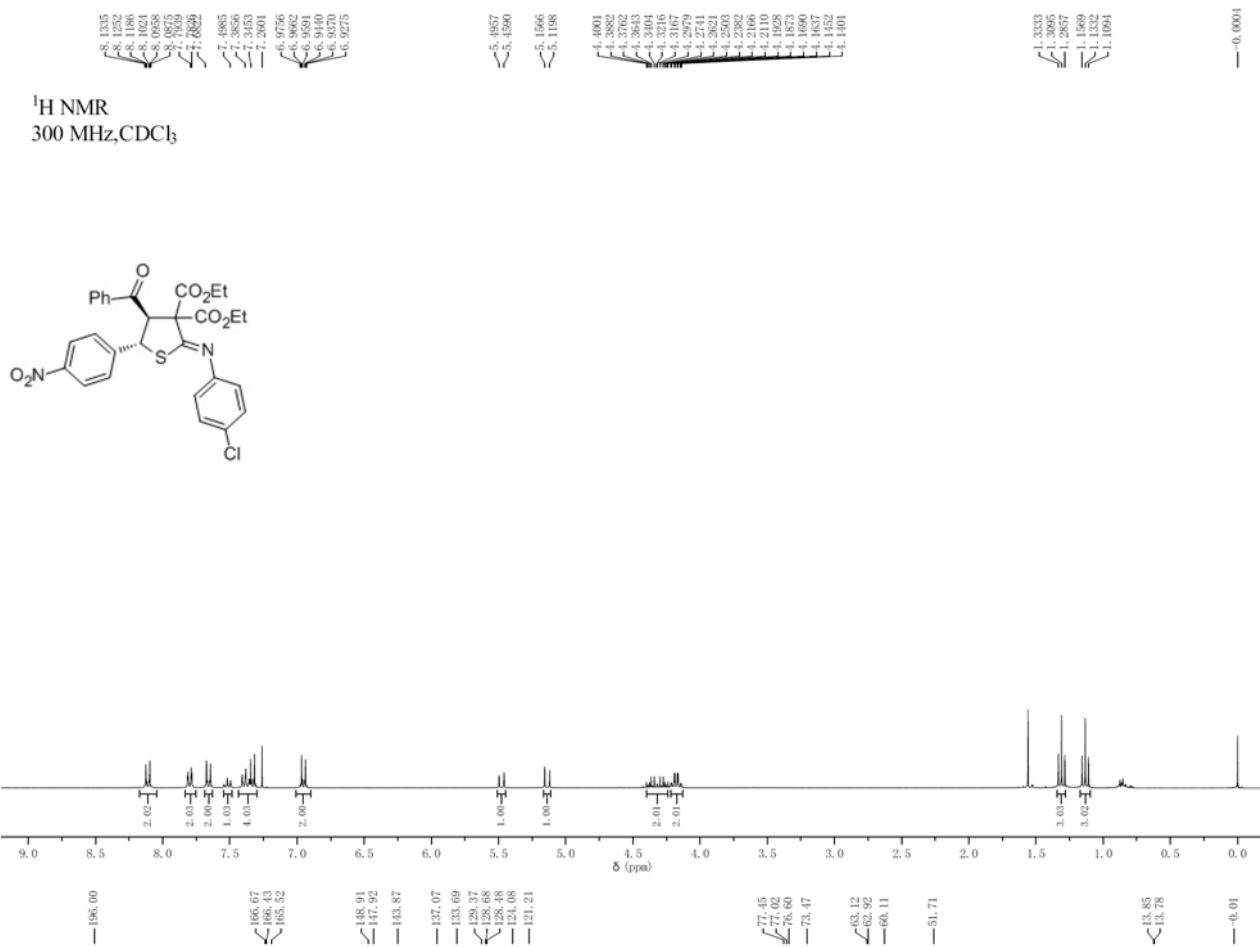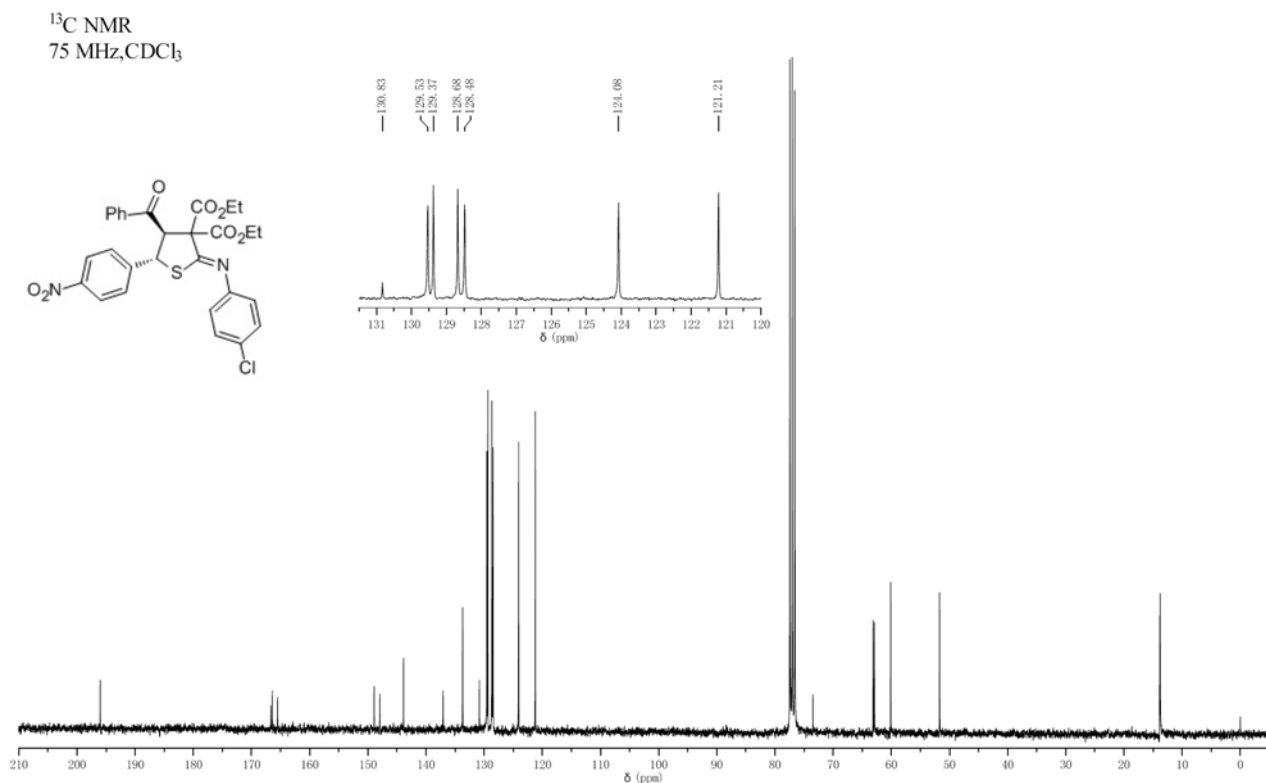

### Compound 3ai

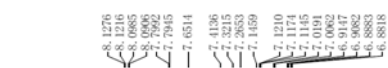

<sup>1</sup>H NMR  
 300 MHz, CDCl<sub>3</sub>

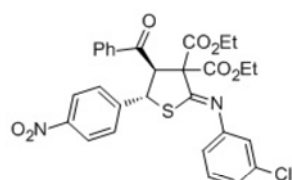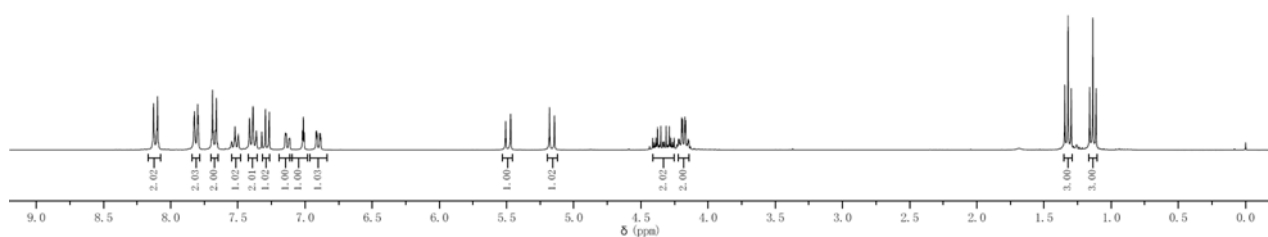

<sup>13</sup>C NMR  
 75 MHz, CDCl<sub>3</sub>

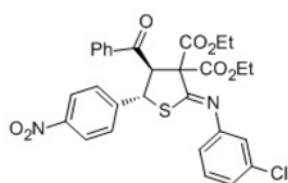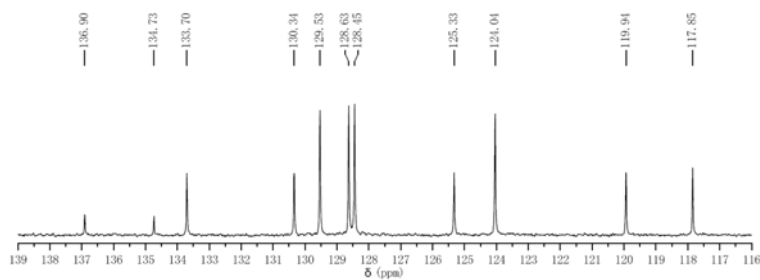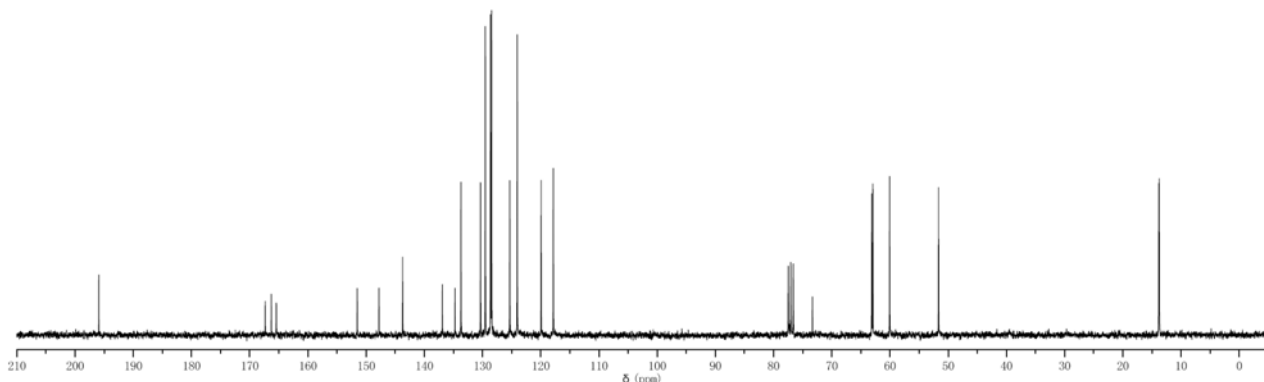

### Compound 3aj

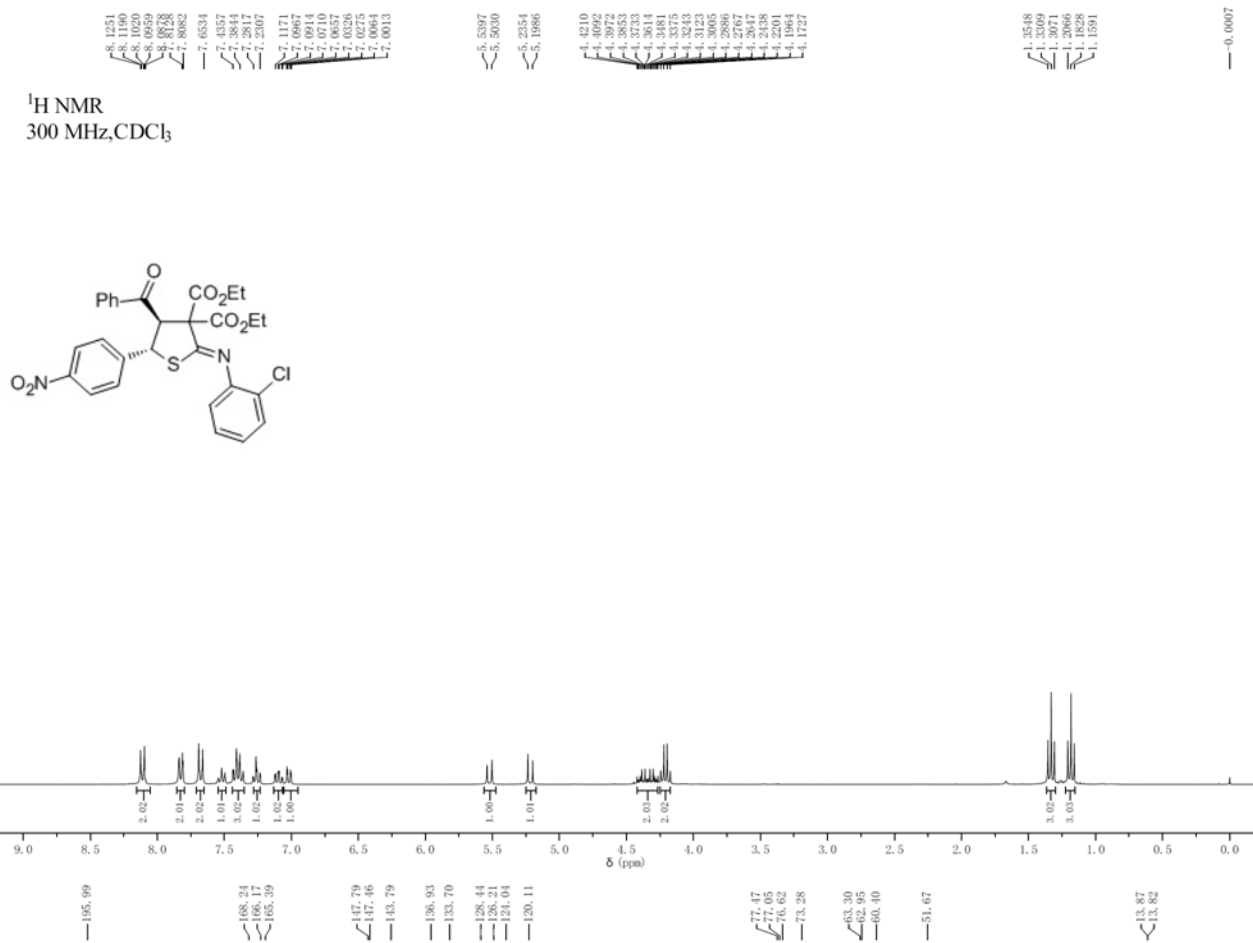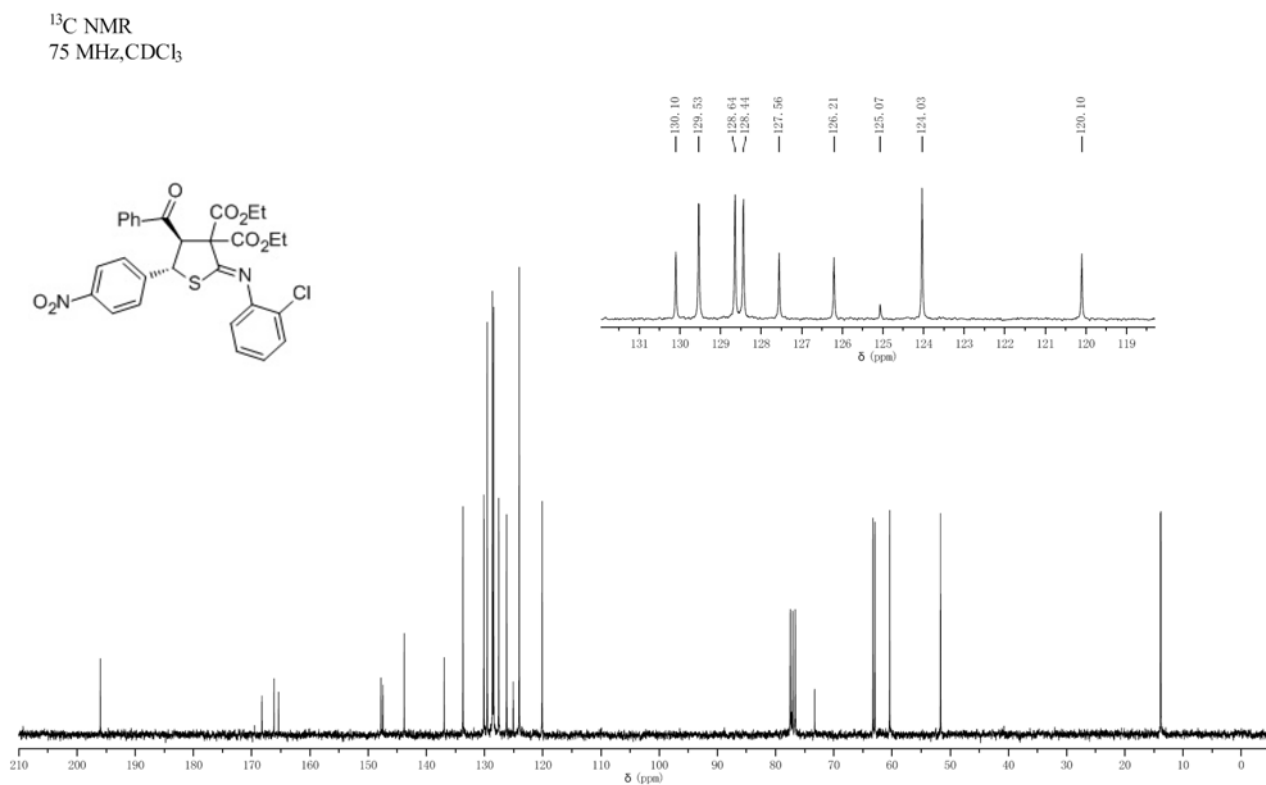

### Compound 3ak

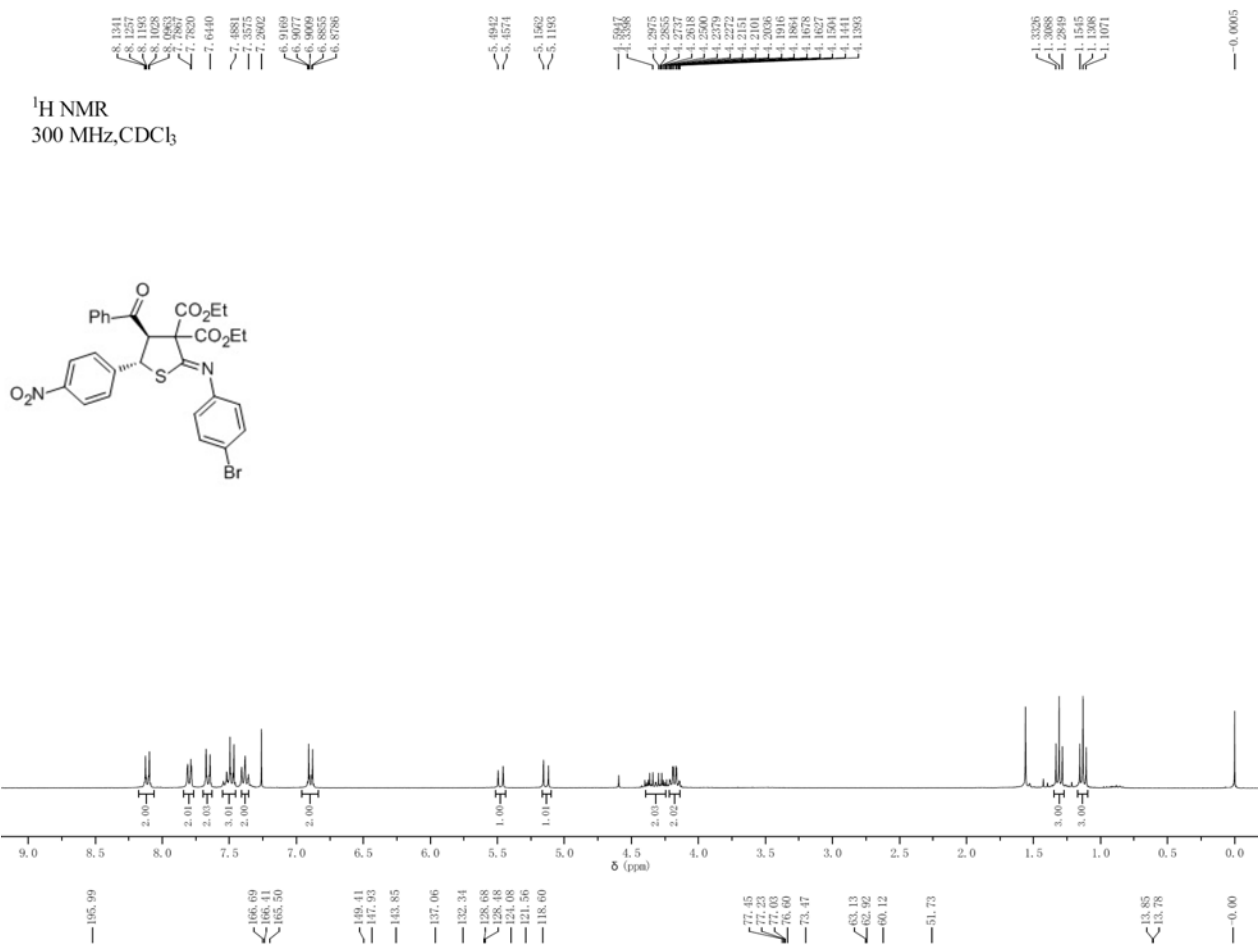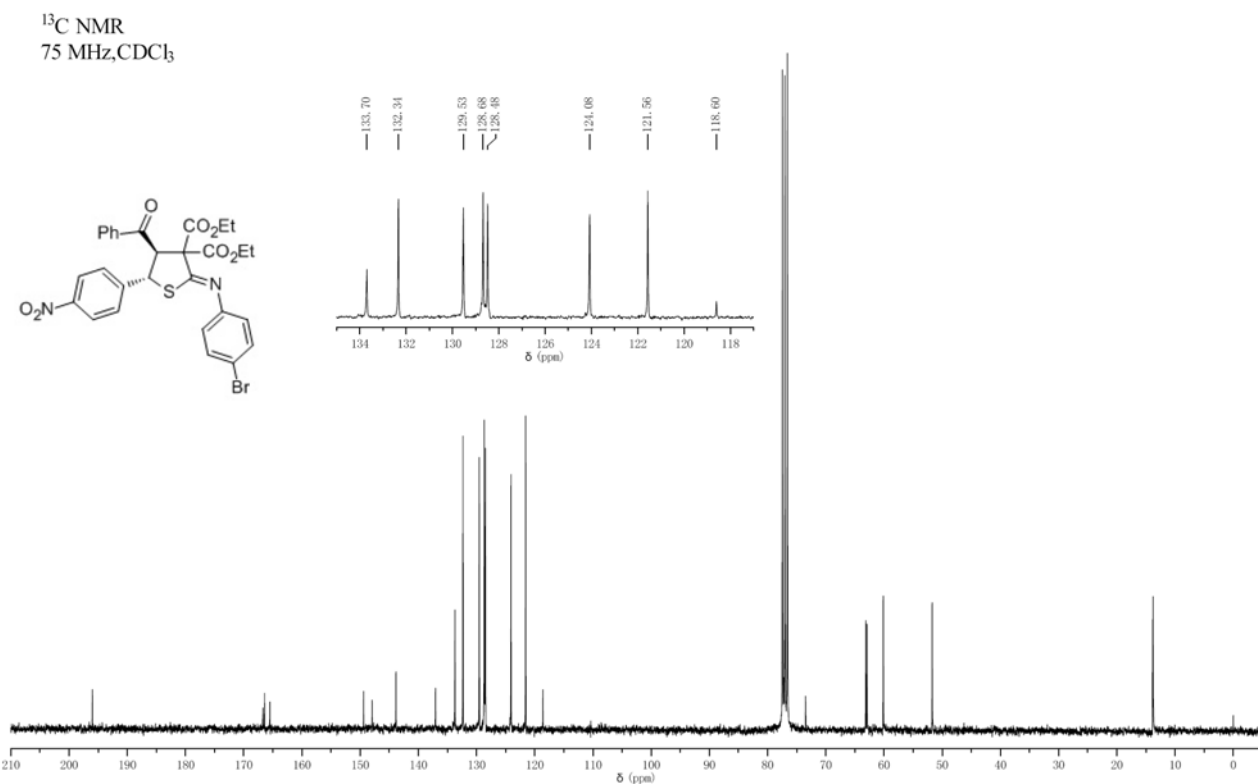

### Compound 3al

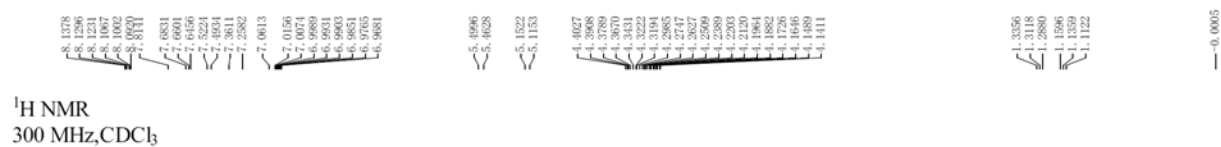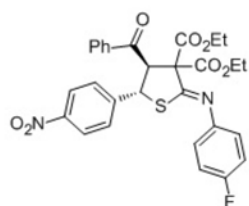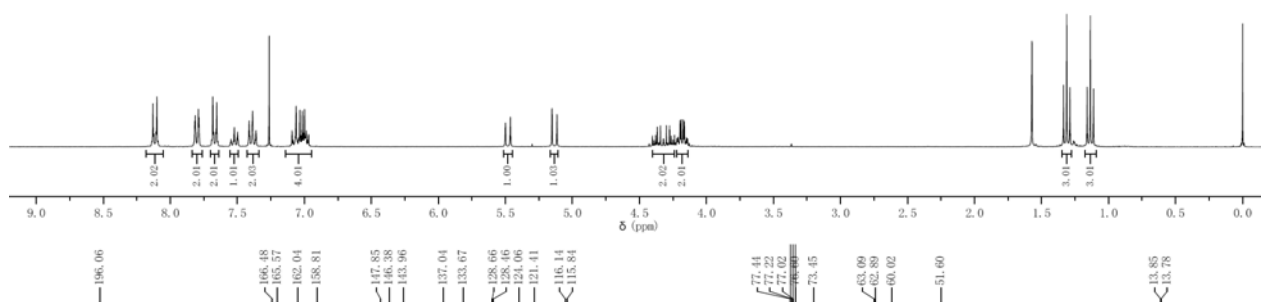

<sup>13</sup>C NMR  
 75 MHz, CDCl<sub>3</sub>

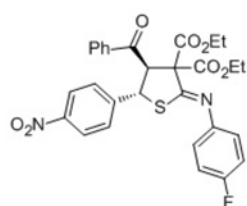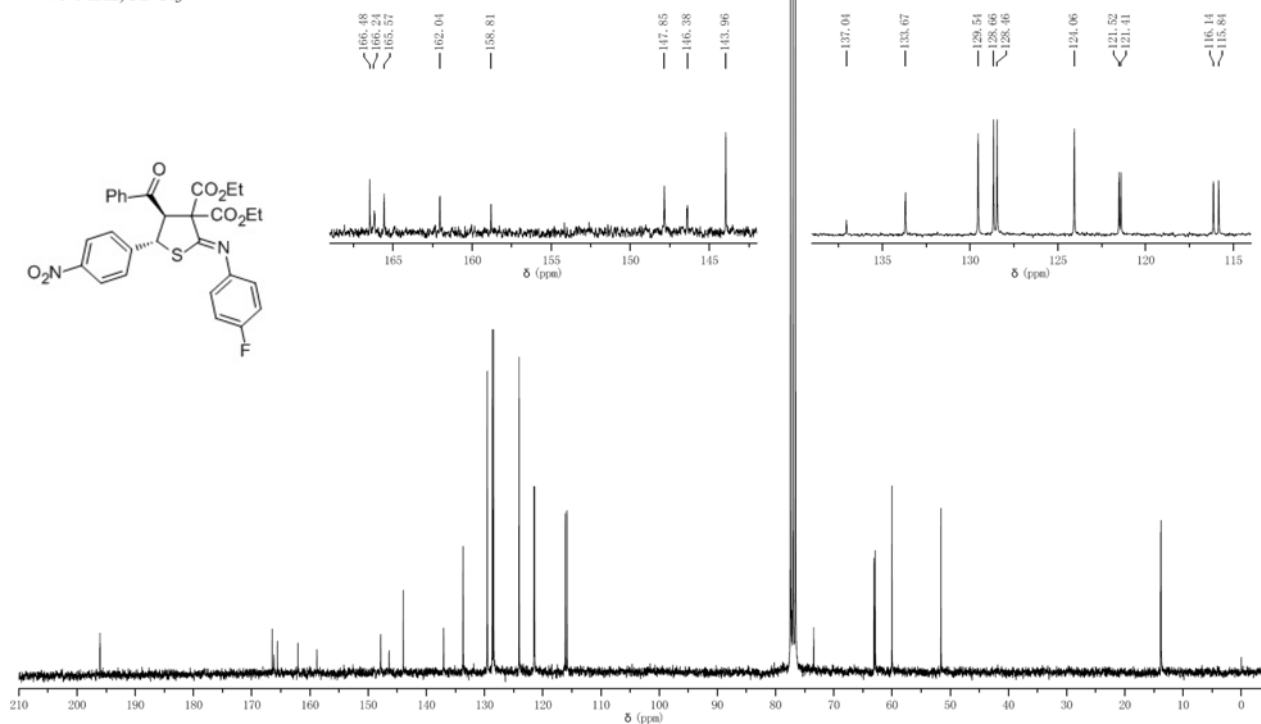

### Compound 3am

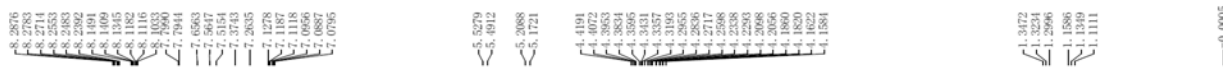

<sup>1</sup>H NMR  
 300 MHz, CDCl<sub>3</sub>

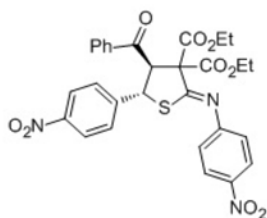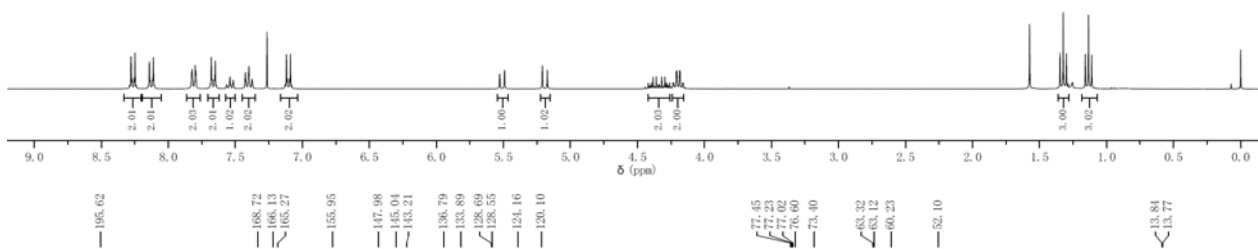

<sup>13</sup>C NMR  
 75 MHz, CDCl<sub>3</sub>

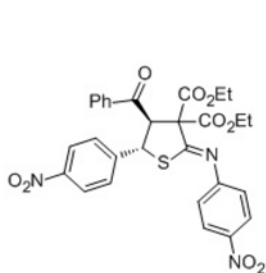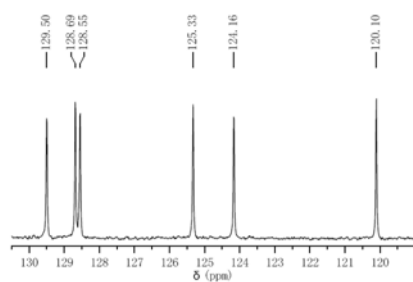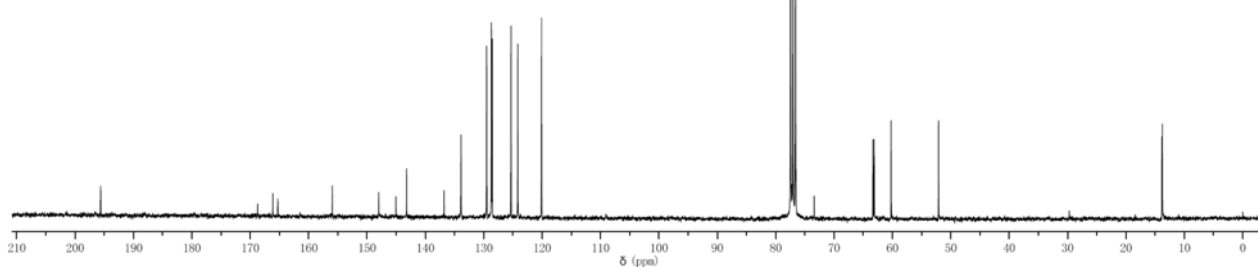

### Compound 3an

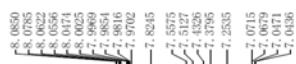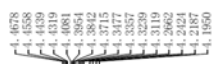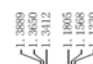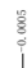

<sup>1</sup>H NMR  
300 MHz, CDCl<sub>3</sub>

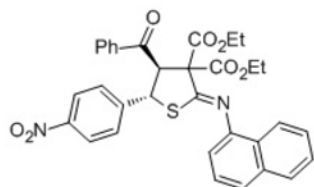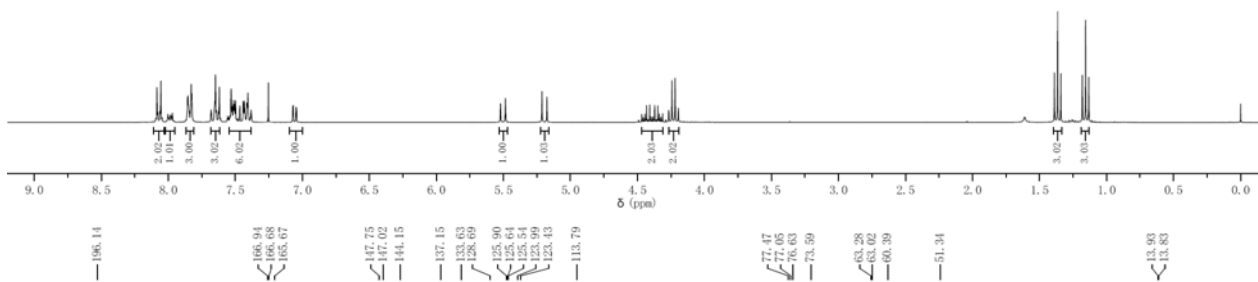

<sup>13</sup>C NMR  
75 MHz, CDCl<sub>3</sub>

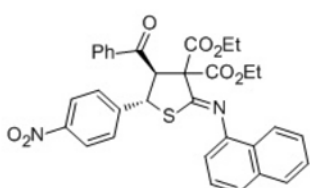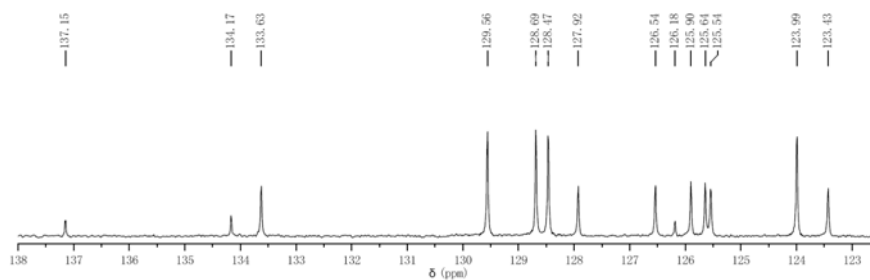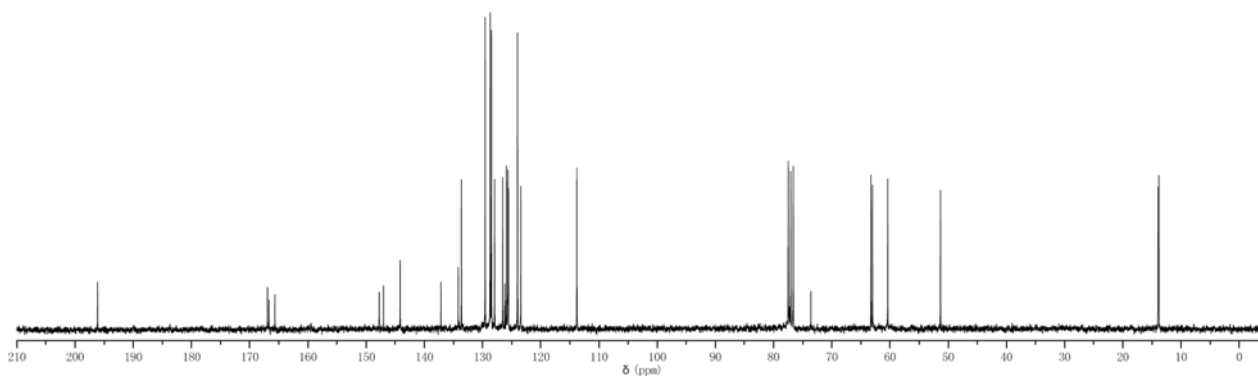

### Compound 3ao

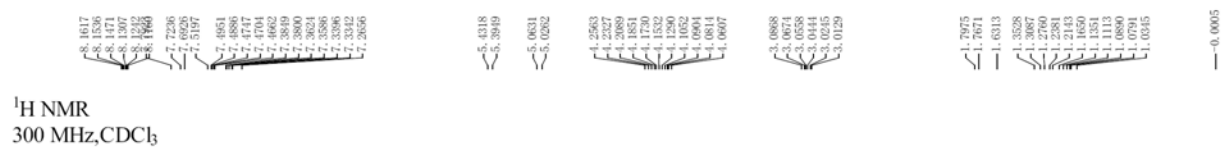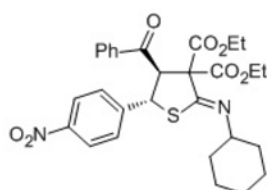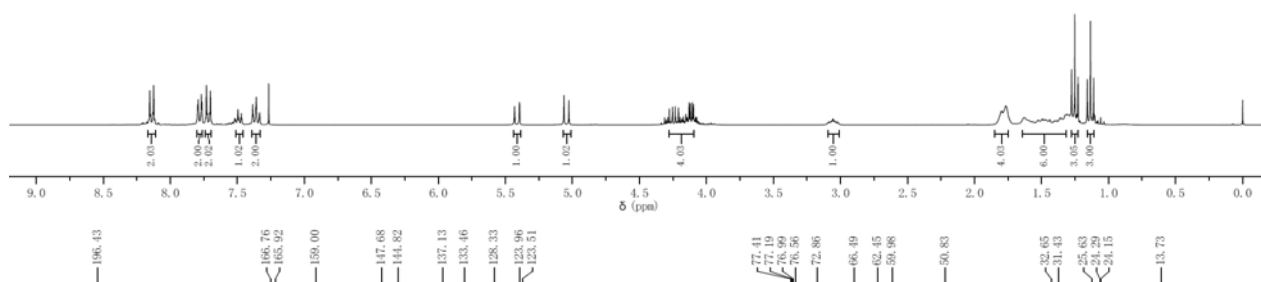

<sup>13</sup>C NMR  
 75 MHz, CDCl<sub>3</sub>

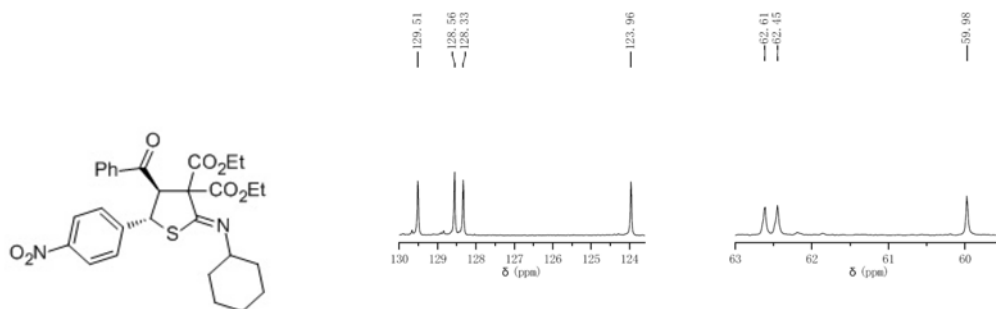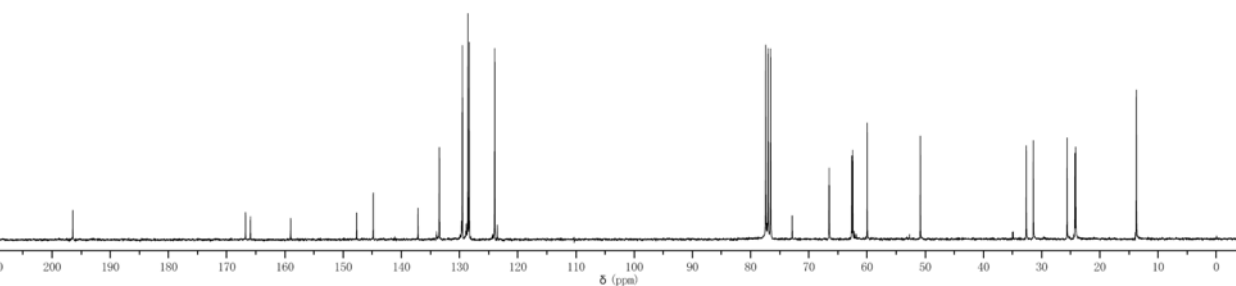



### Compound 3ap

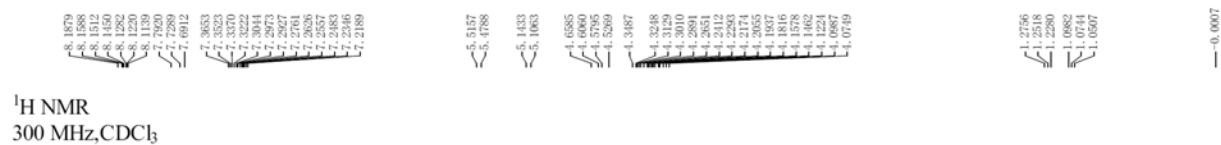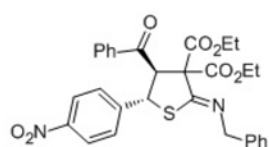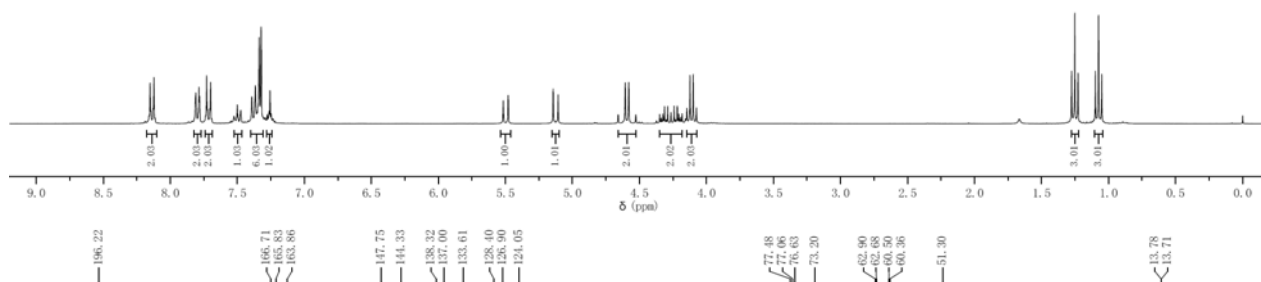

<sup>13</sup>C NMR  
 75 MHz, CDCl<sub>3</sub>

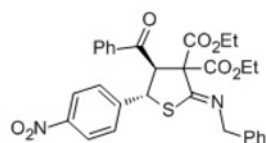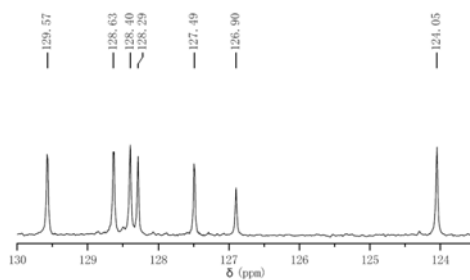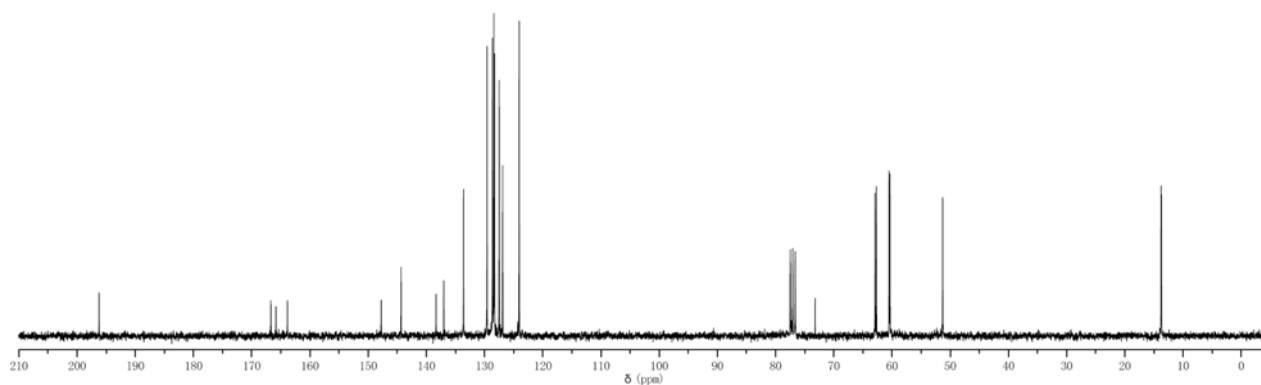

### Compound 3aq

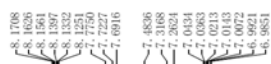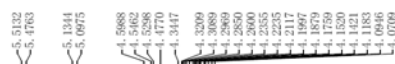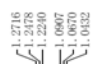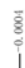

<sup>1</sup>H NMR  
 300 MHz, CDCl<sub>3</sub>

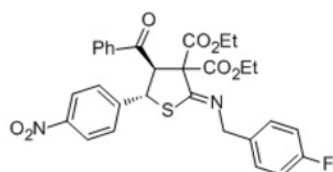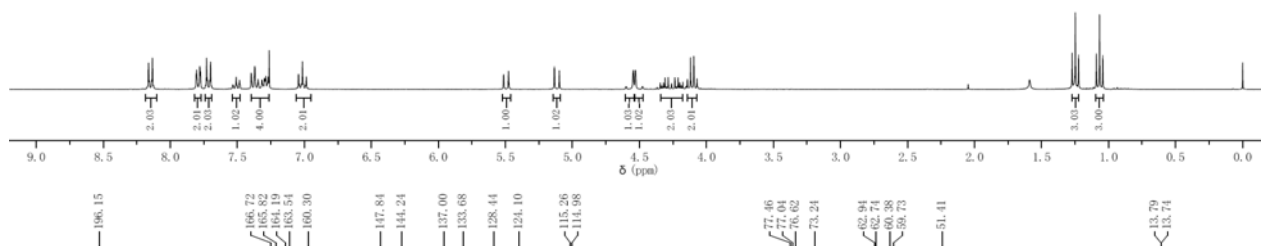

<sup>13</sup>C NMR  
 75 MHz, CDCl<sub>3</sub>

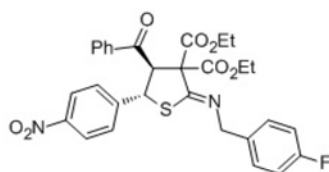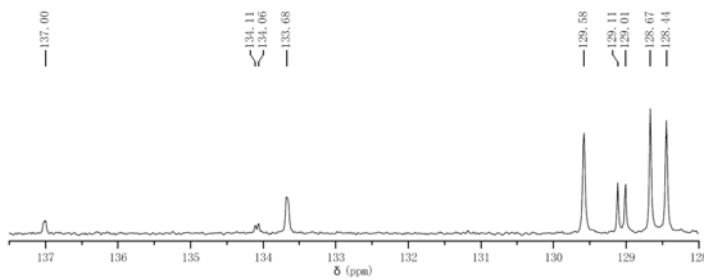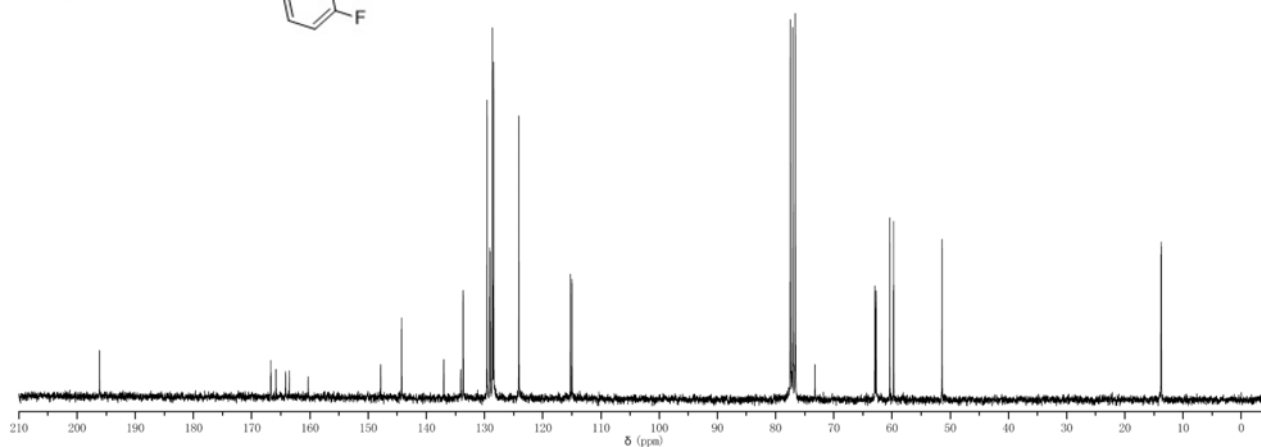

Compound **3ba**

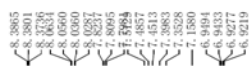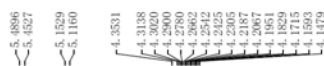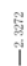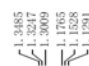

<sup>1</sup>H NMR  
300 MHz, CDCl<sub>3</sub>

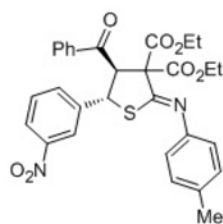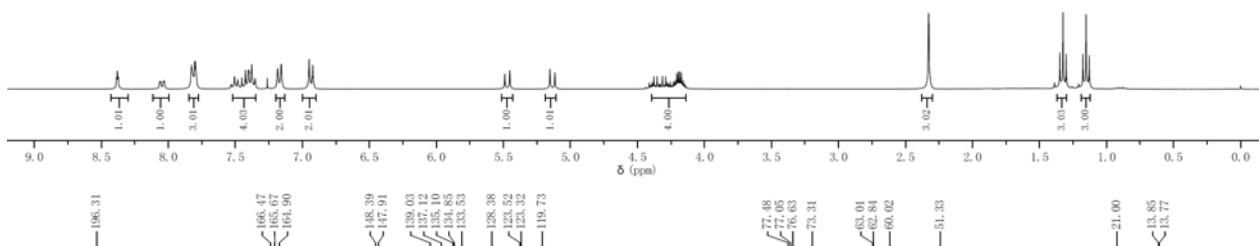

<sup>13</sup>C NMR  
75 MHz, CDCl<sub>3</sub>

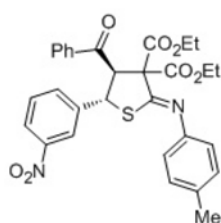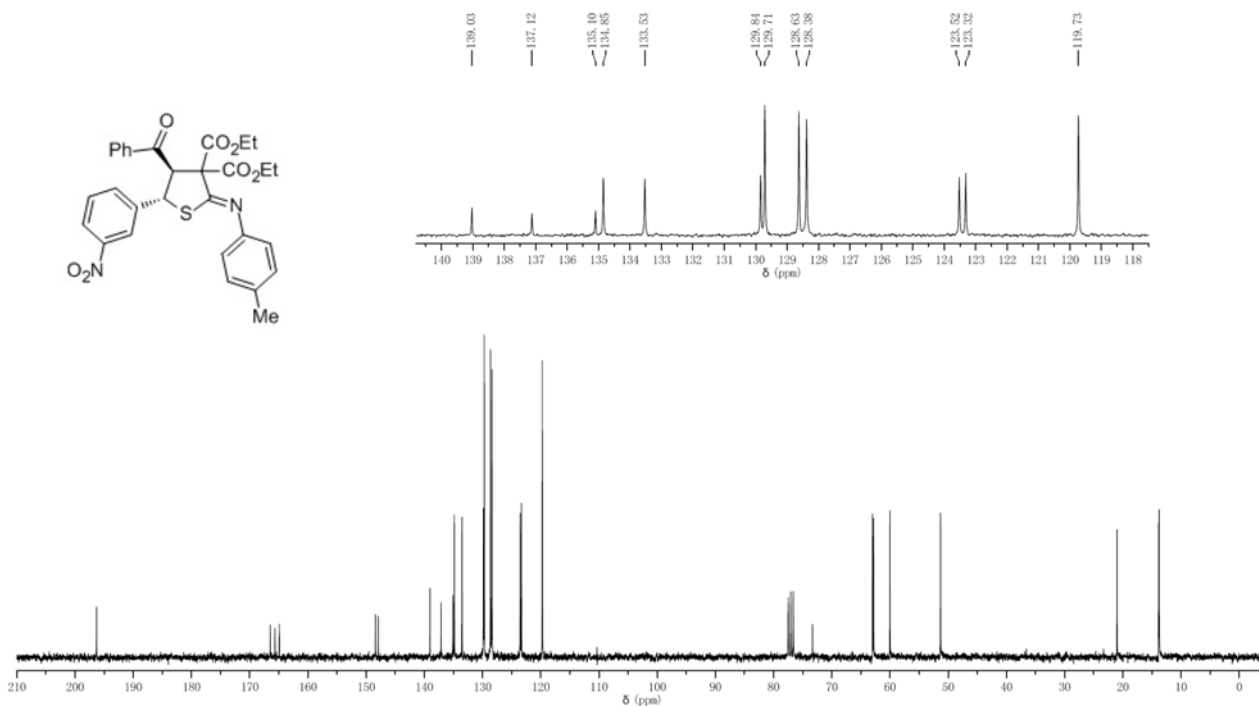

### Compound 3bd

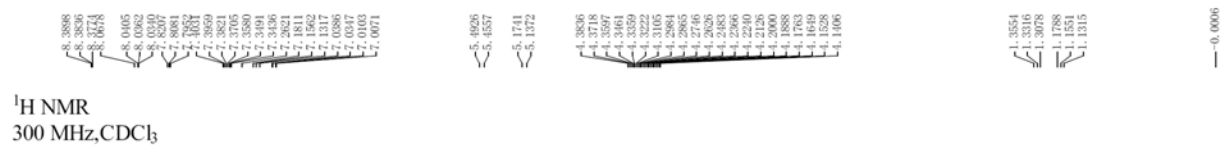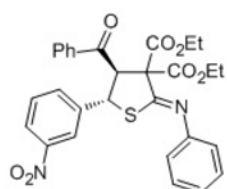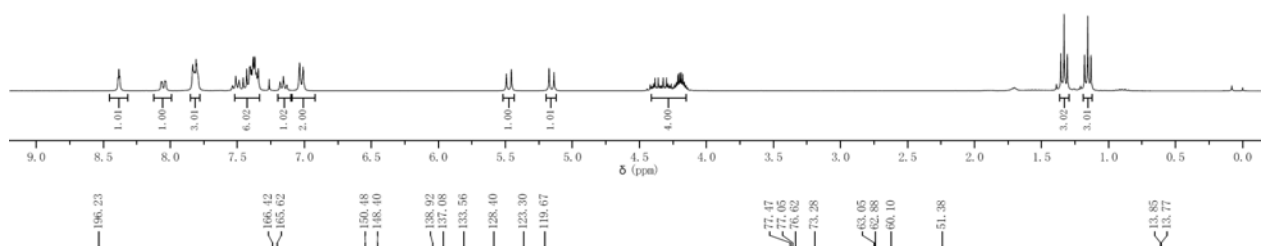

<sup>13</sup>C NMR  
 75 MHz, CDCl<sub>3</sub>

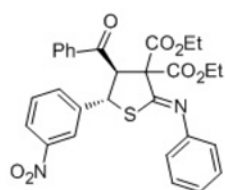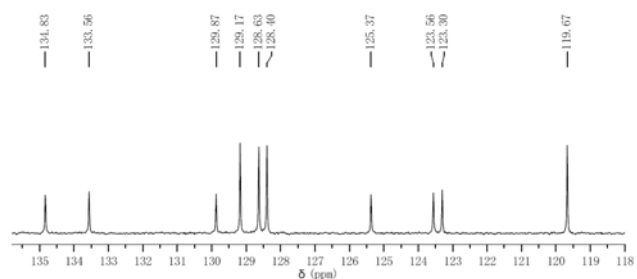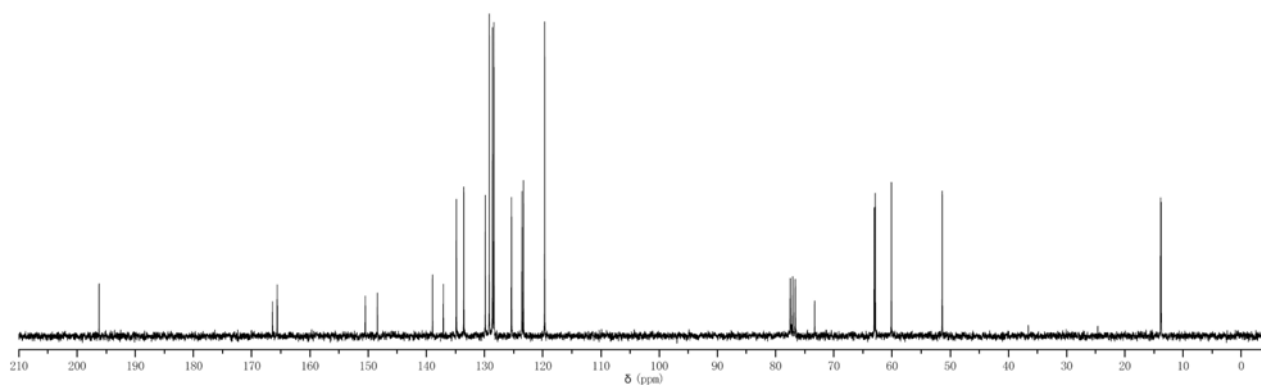

### Compound 3be

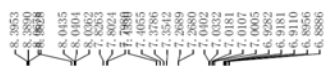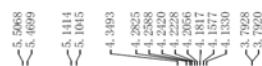

<sup>1</sup>H NMR  
300 MHz, CDCl<sub>3</sub>

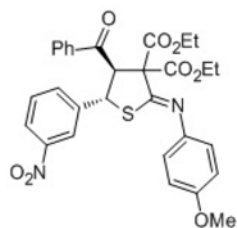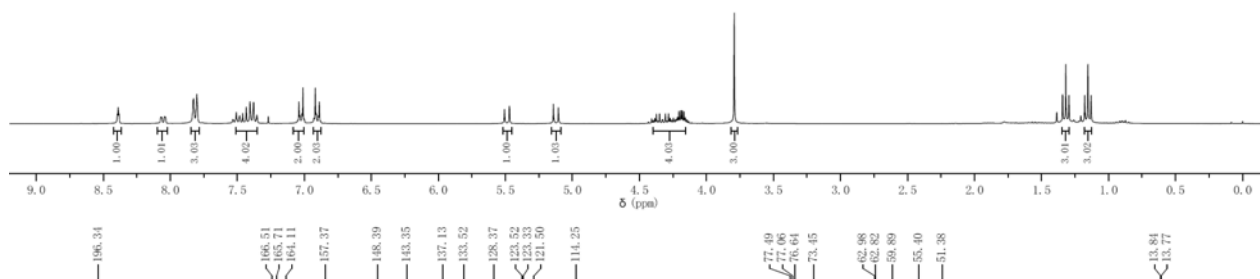

<sup>13</sup>C NMR  
75 MHz, CDCl<sub>3</sub>

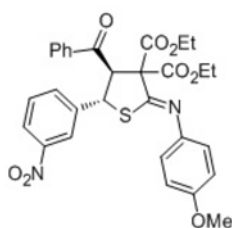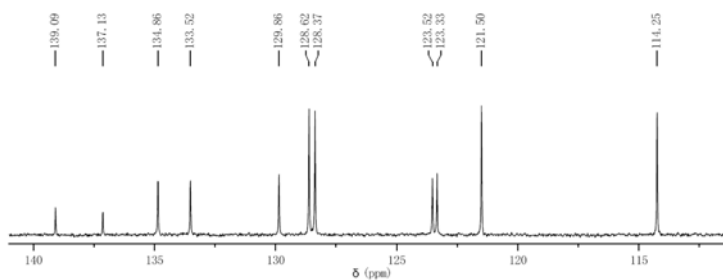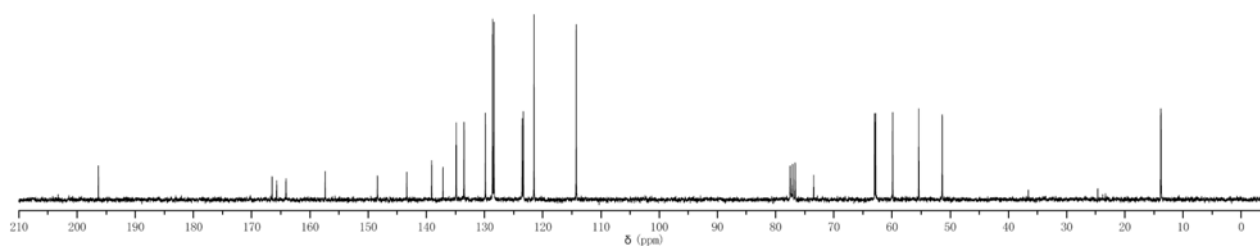

### Compound 3bh

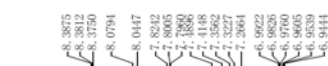

<sup>1</sup>H NMR  
300 MHz, CDCl<sub>3</sub>

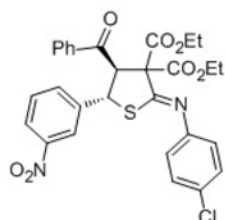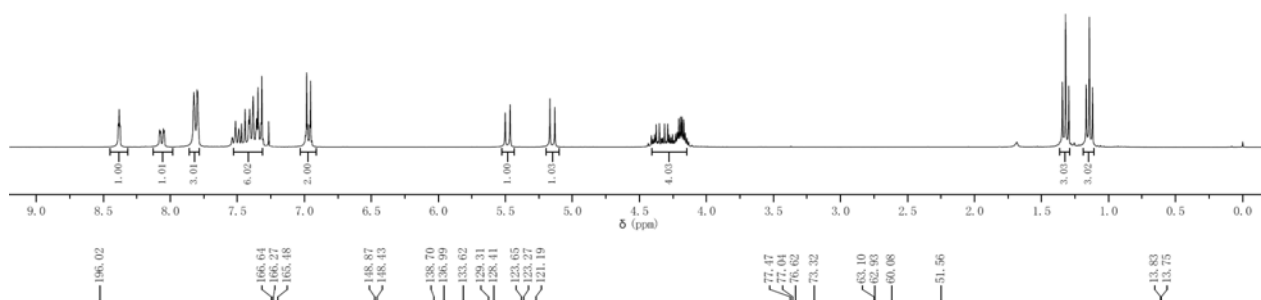

<sup>13</sup>C NMR  
75 MHz, CDCl<sub>3</sub>

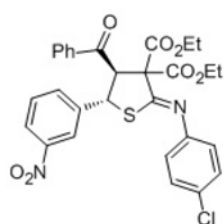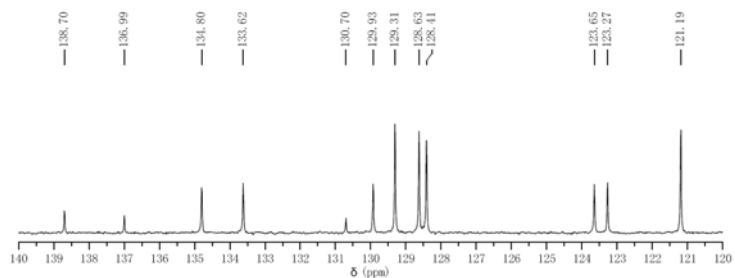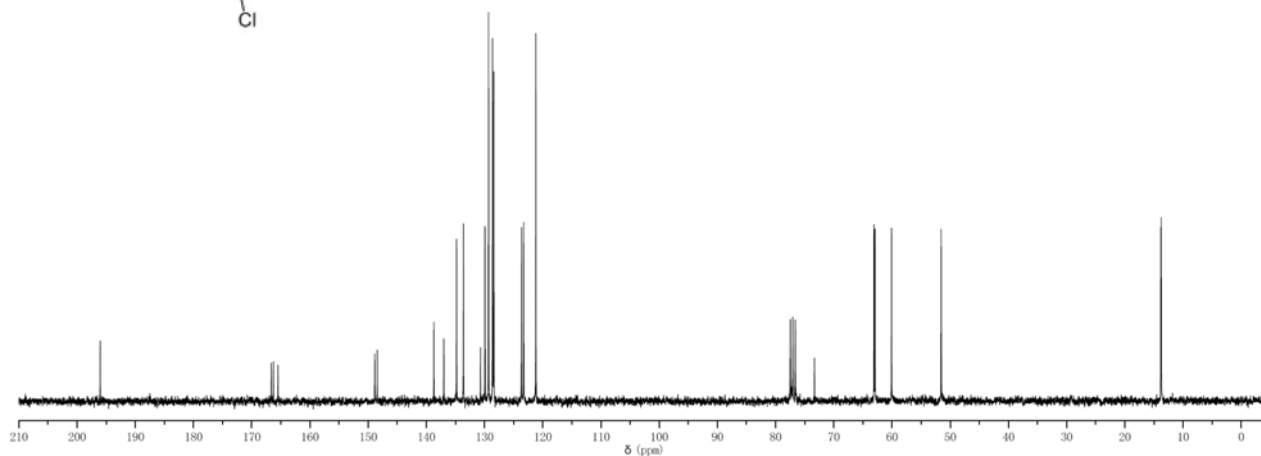

### Compound 3bk

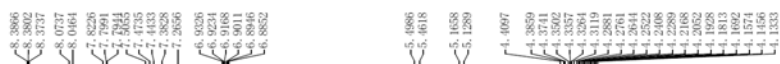

<sup>1</sup>H NMR  
 300 MHz, CDCl<sub>3</sub>

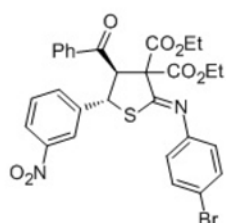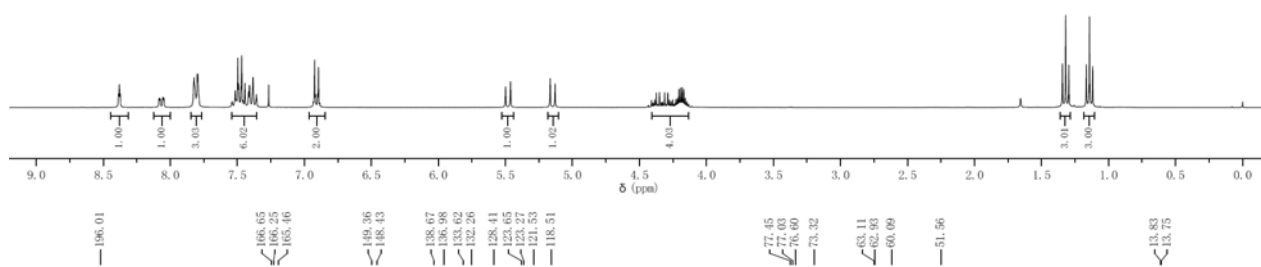

<sup>13</sup>C NMR  
 75 MHz, CDCl<sub>3</sub>

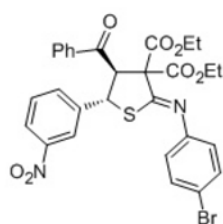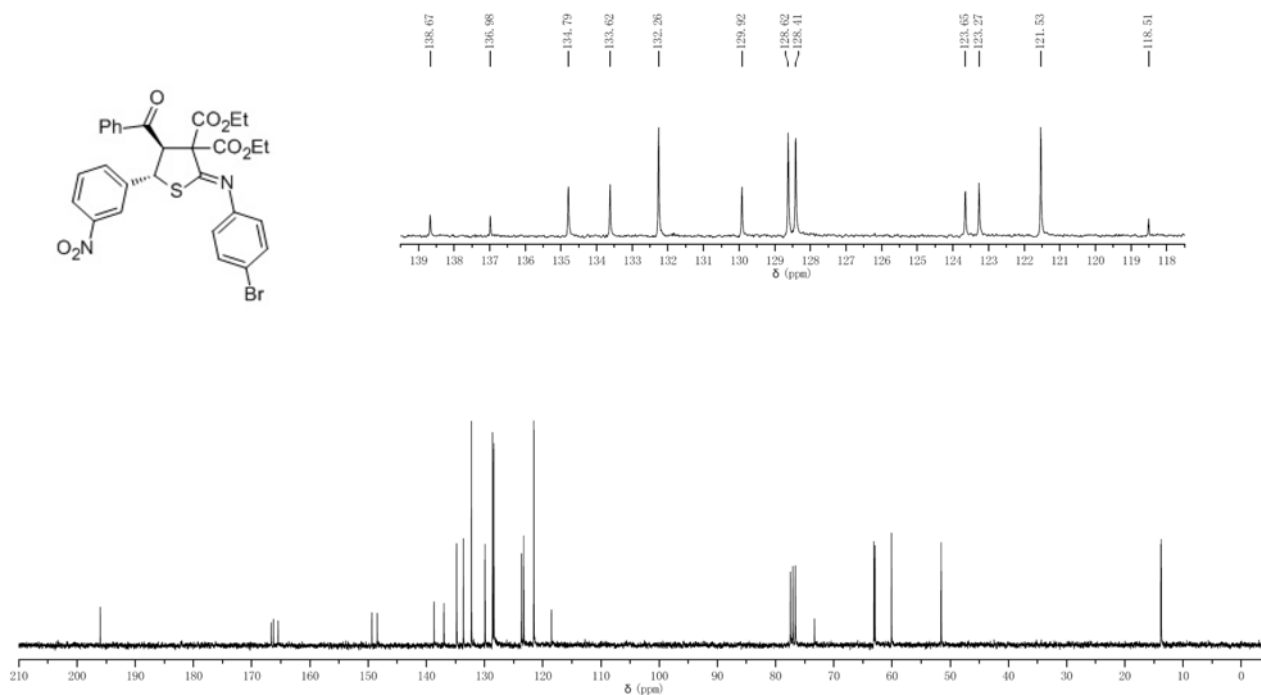

### Compound 3bm

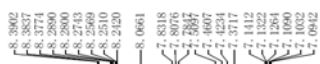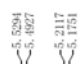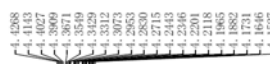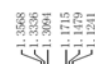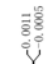

<sup>1</sup>H NMR  
300 MHz, CDCl<sub>3</sub>

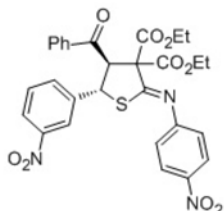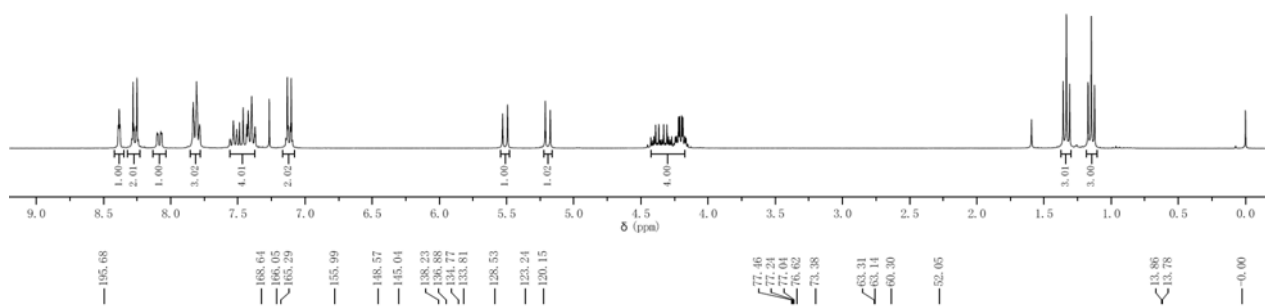

<sup>13</sup>C NMR  
75 MHz, CDCl<sub>3</sub>

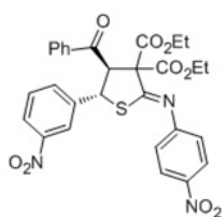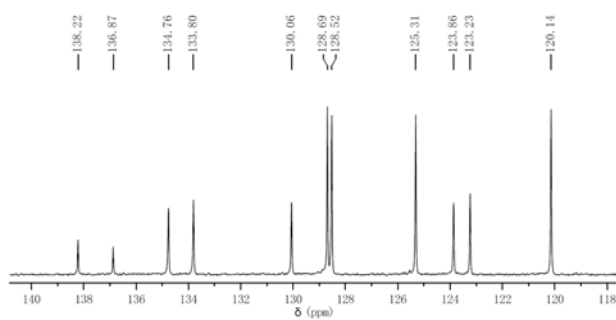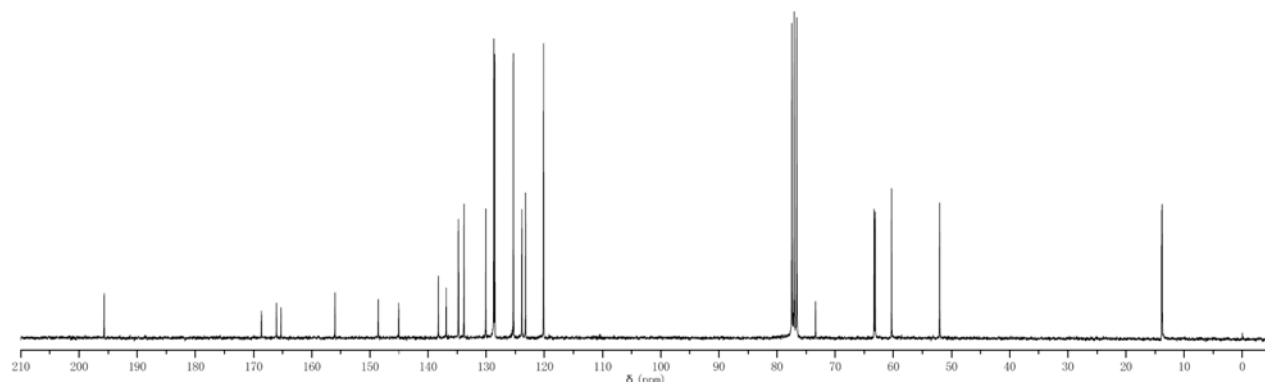



### Compound 3ca

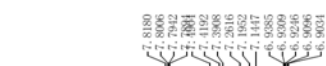

<sup>1</sup>H NMR  
300 MHz, CDCl<sub>3</sub>

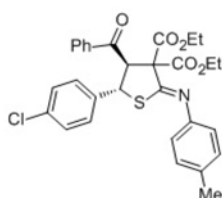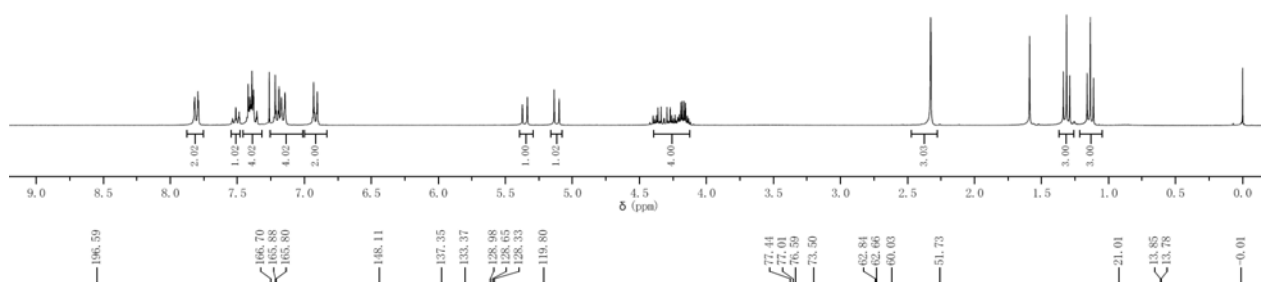

<sup>13</sup>C NMR  
75 MHz, CDCl<sub>3</sub>

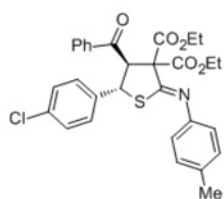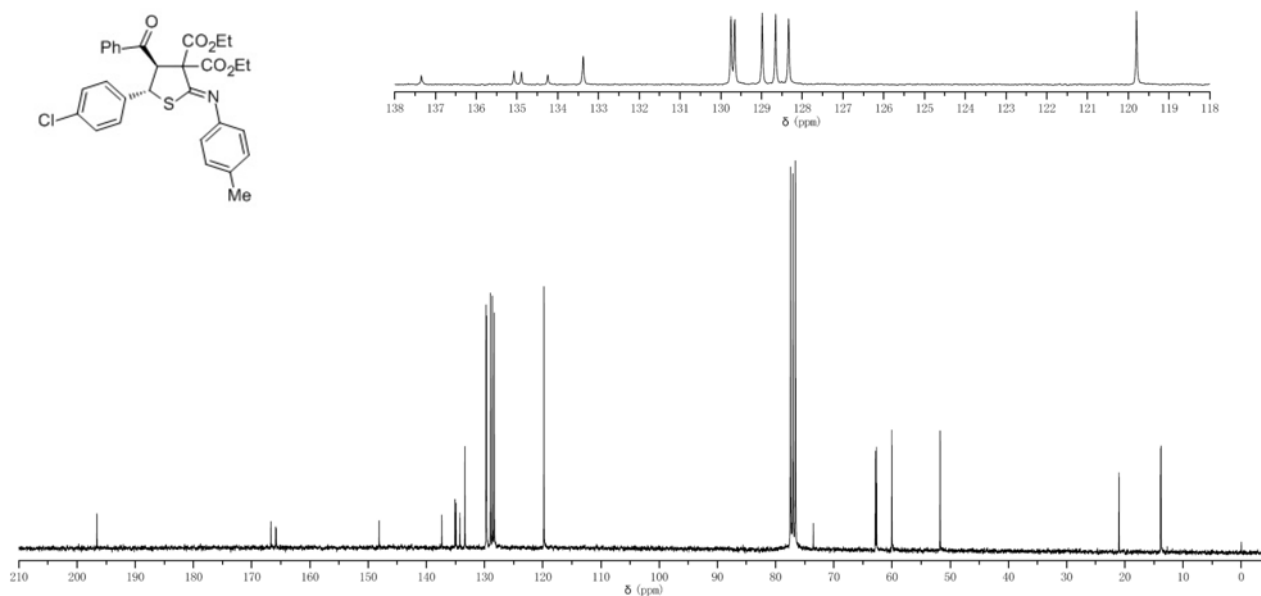

### Compound 3cd

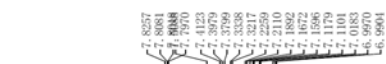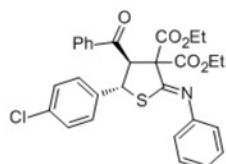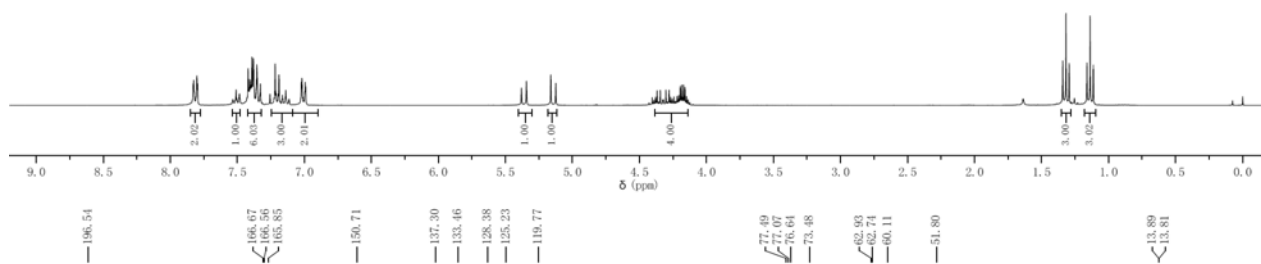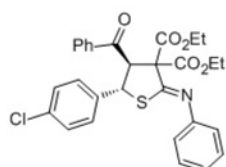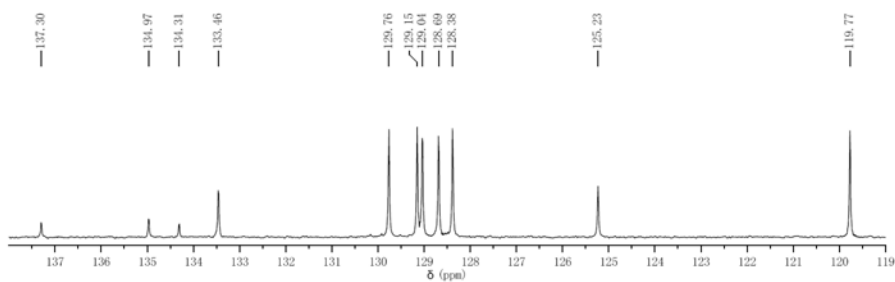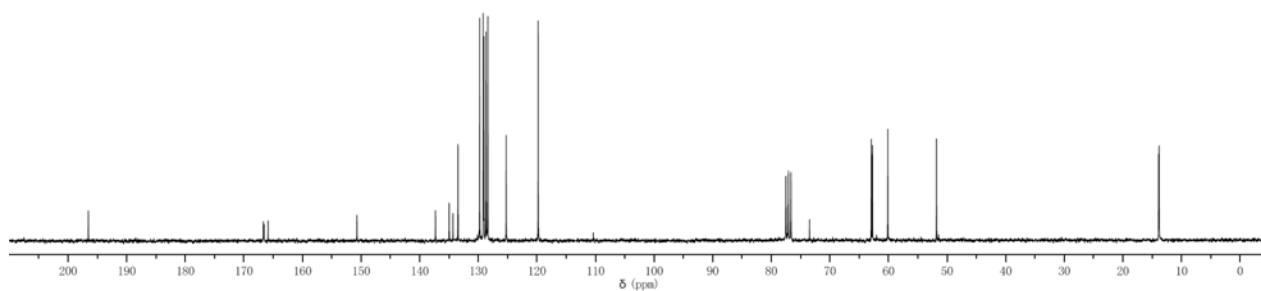

### Compound 3ce

<sup>1</sup>H NMR  
300 MHz, CDCl<sub>3</sub>

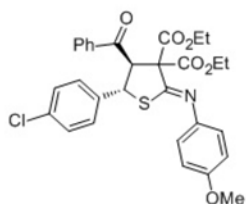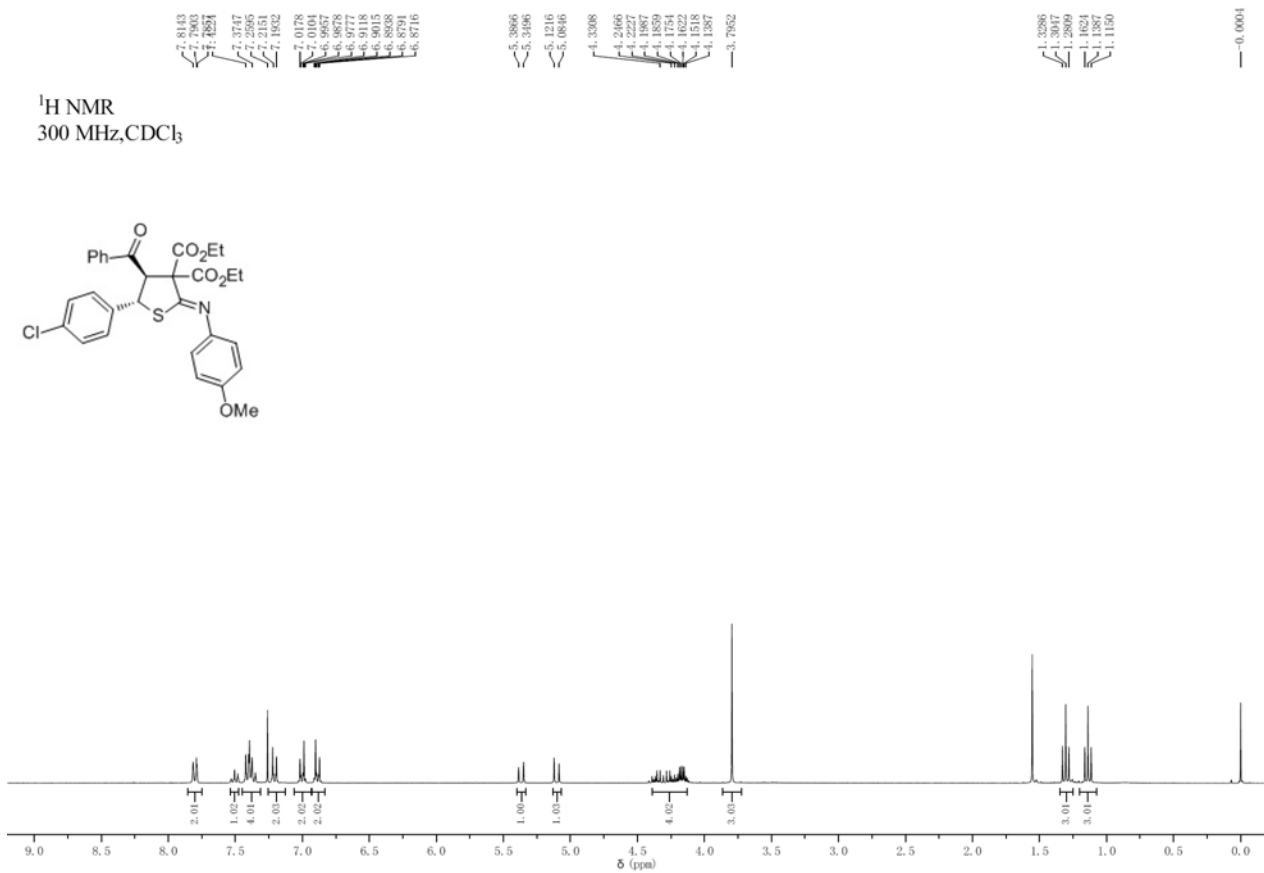

<sup>13</sup>C NMR  
75 MHz, CDCl<sub>3</sub>

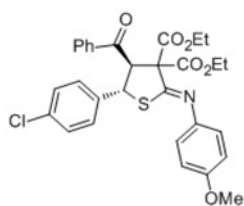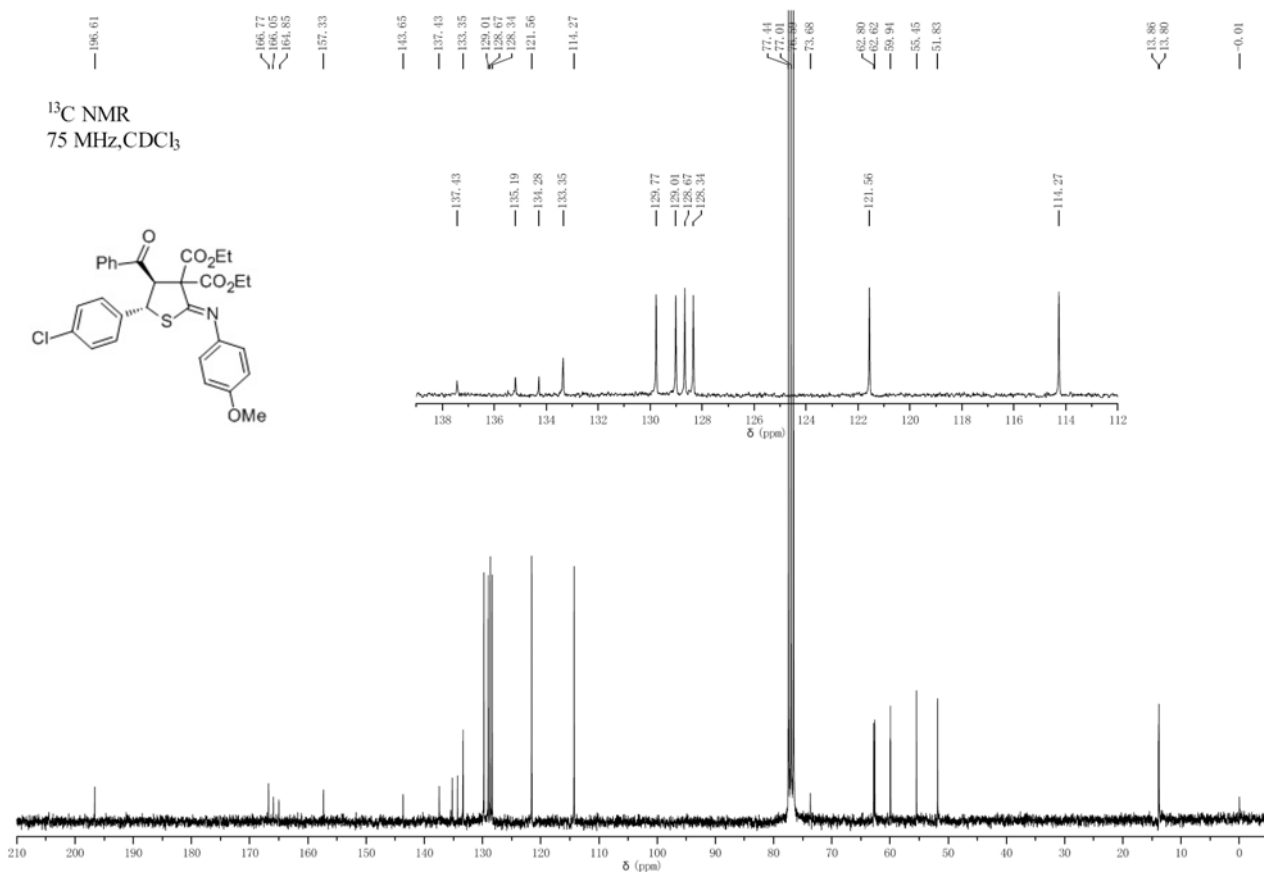

### Compound 3ch

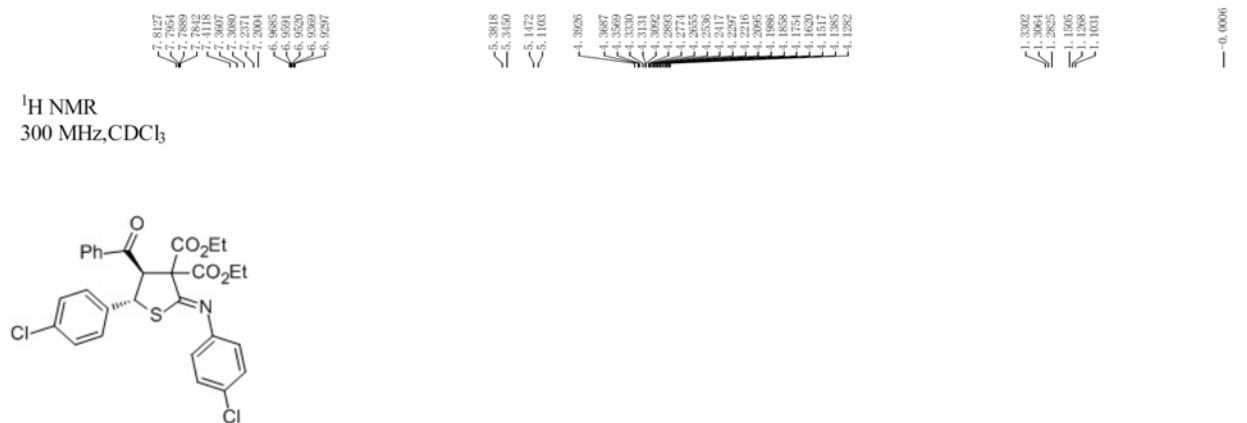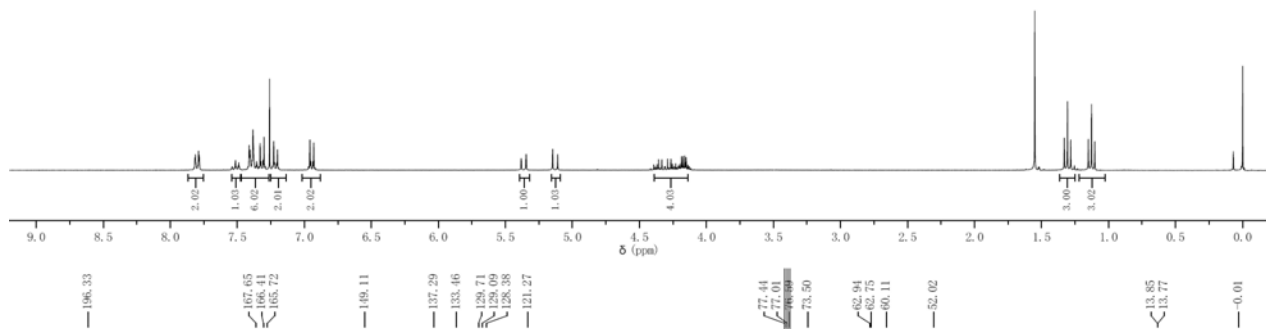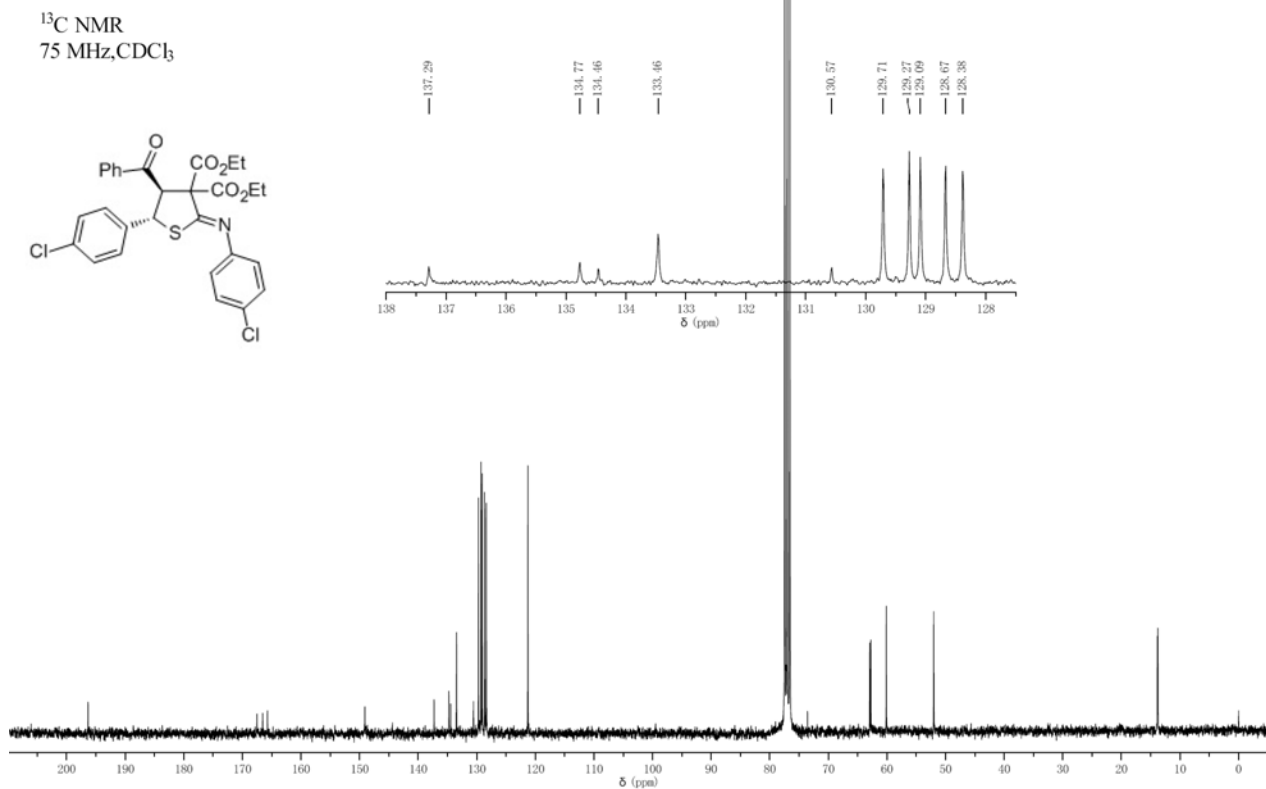

### Compound 3ck

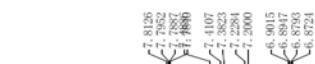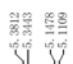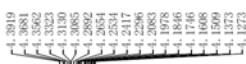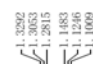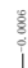

<sup>1</sup>H NMR  
300 MHz, CDCl<sub>3</sub>

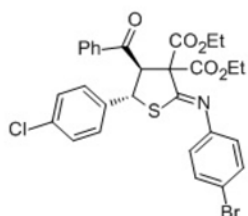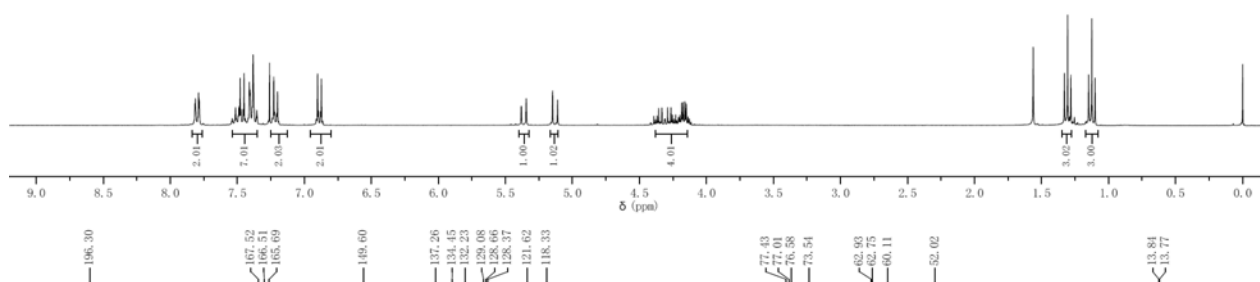

<sup>13</sup>C NMR  
75 MHz, CDCl<sub>3</sub>

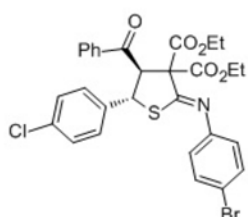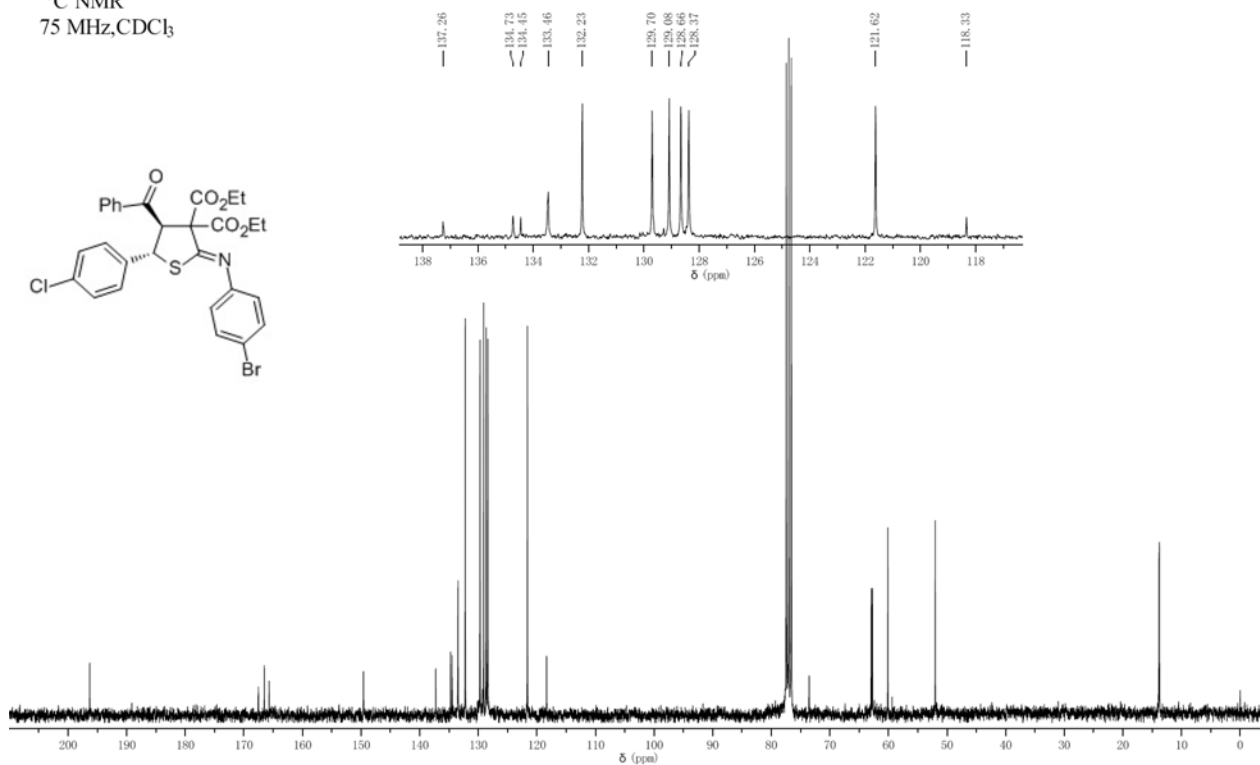

### Compound 3da

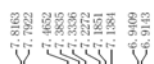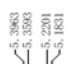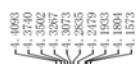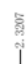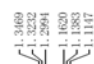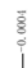

<sup>1</sup>H NMR  
300 MHz, CDCl<sub>3</sub>

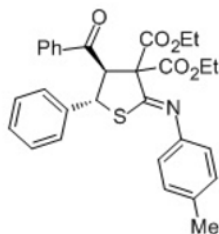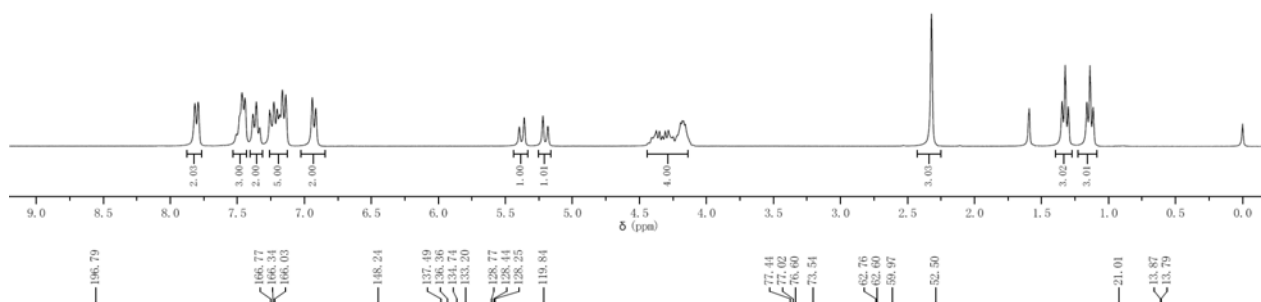

<sup>13</sup>C NMR  
75 MHz, CDCl<sub>3</sub>

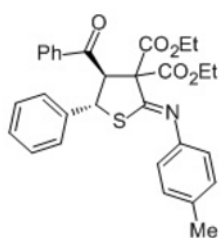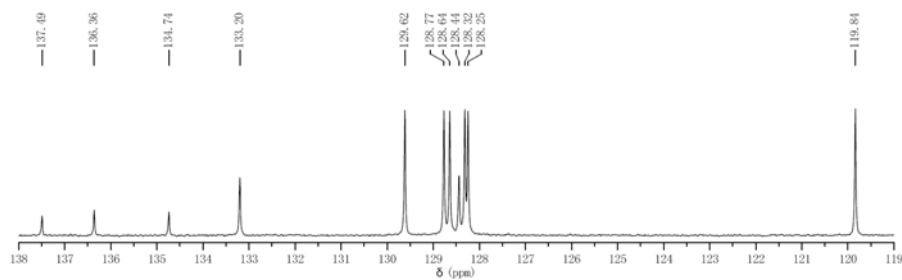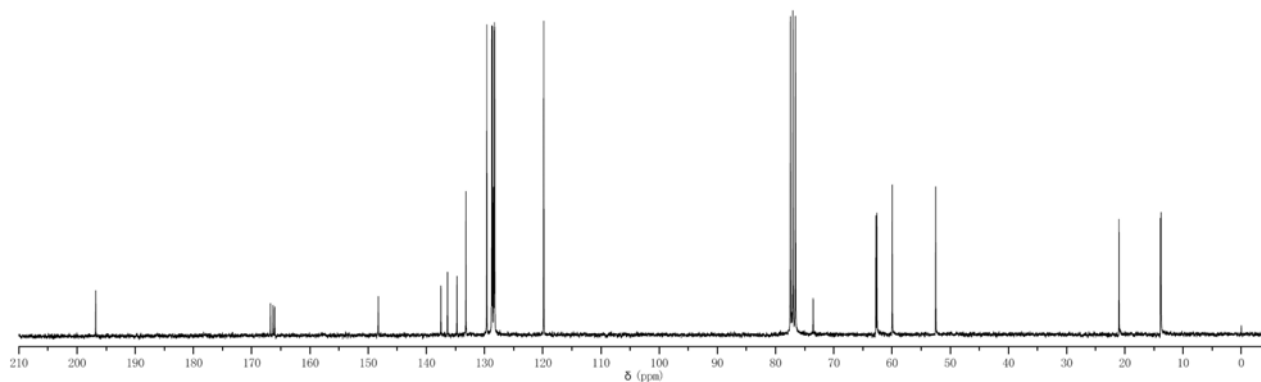

### Compound 3db

7.8355  
7.8311  
7.8267  
7.8084  
7.8038  
7.4222  
7.3657  
7.3510  
7.1831  
7.1831  
6.9348  
6.8344  
6.8105

5.4023  
5.3653  
5.2463  
5.2063  
4.3603  
4.3365  
4.3171  
4.3070  
4.2953  
4.2833  
4.2715  
4.2596  
4.2474  
4.2124  
4.2007  
4.1887  
4.1768  
4.1650  
4.1530  
4.1414

2.3469  
2.3325

1.3264  
1.3226  
1.3087  
1.0714  
1.1514  
1.1216

-0.0075

<sup>1</sup>H NMR  
300 MHz, CDCl<sub>3</sub>

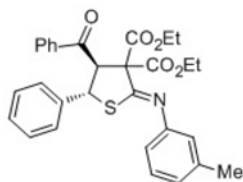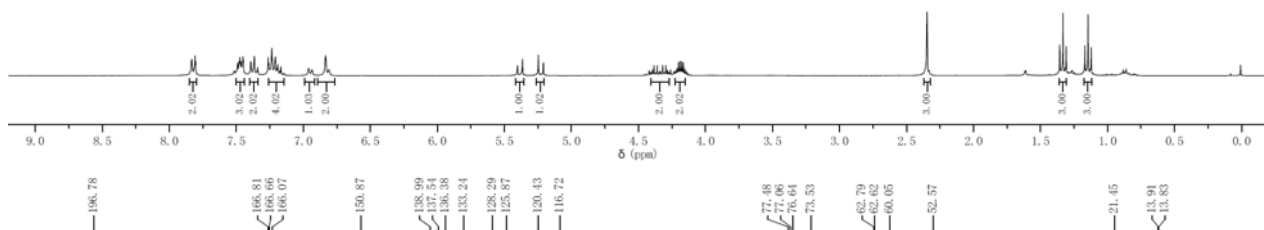

<sup>13</sup>C NMR  
75 MHz, CDCl<sub>3</sub>

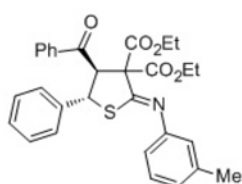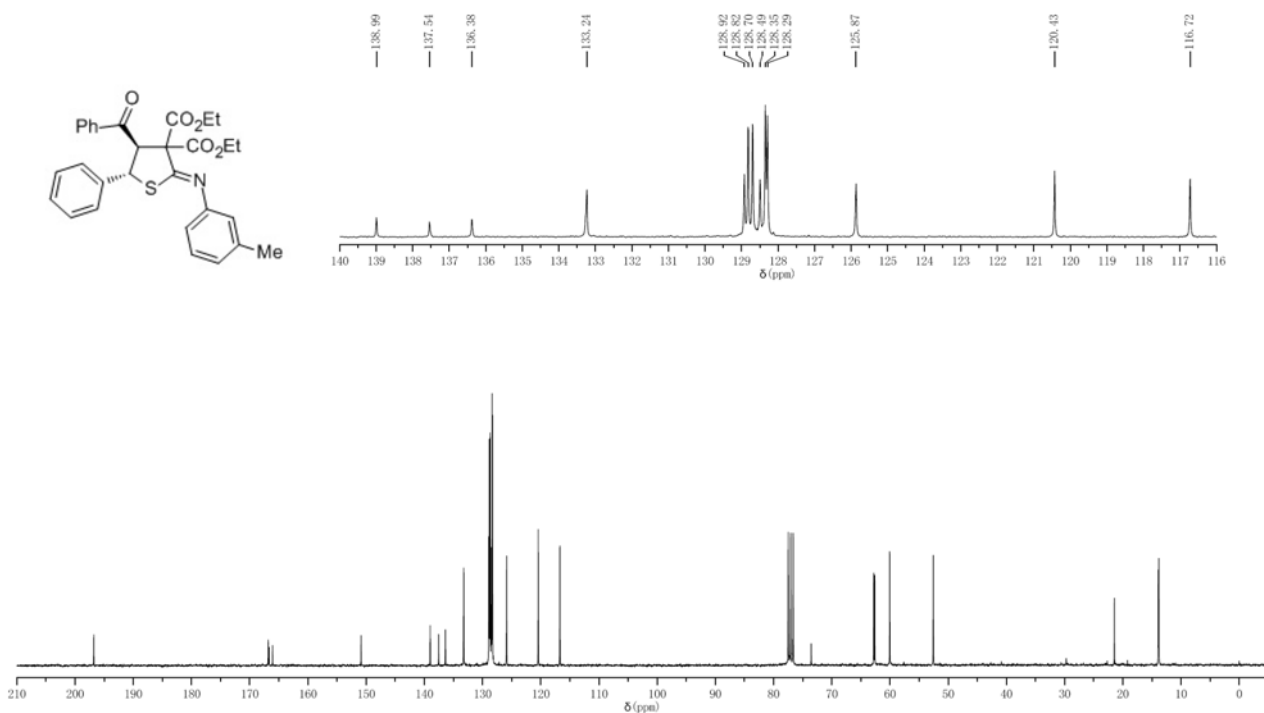

### Compound 3dc

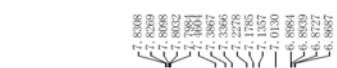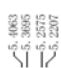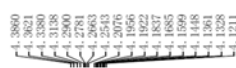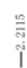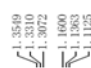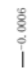

<sup>1</sup>H NMR  
300 MHz, CDCl<sub>3</sub>

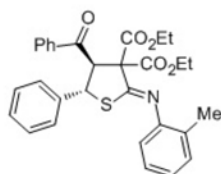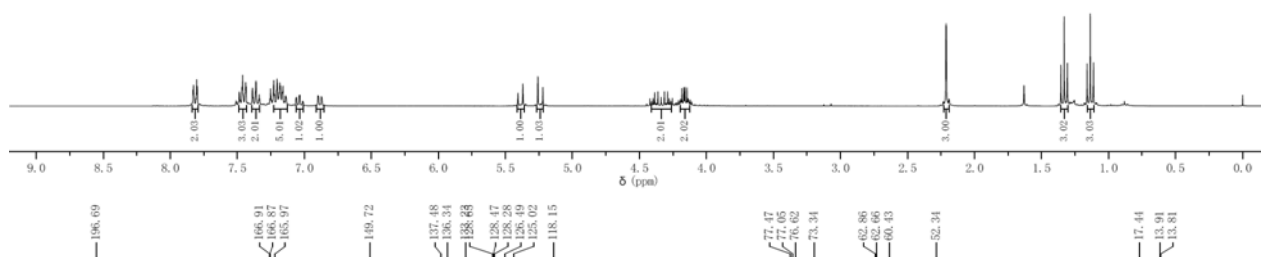

<sup>13</sup>C NMR  
75 MHz, CDCl<sub>3</sub>

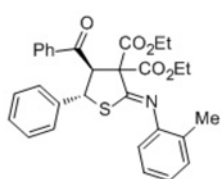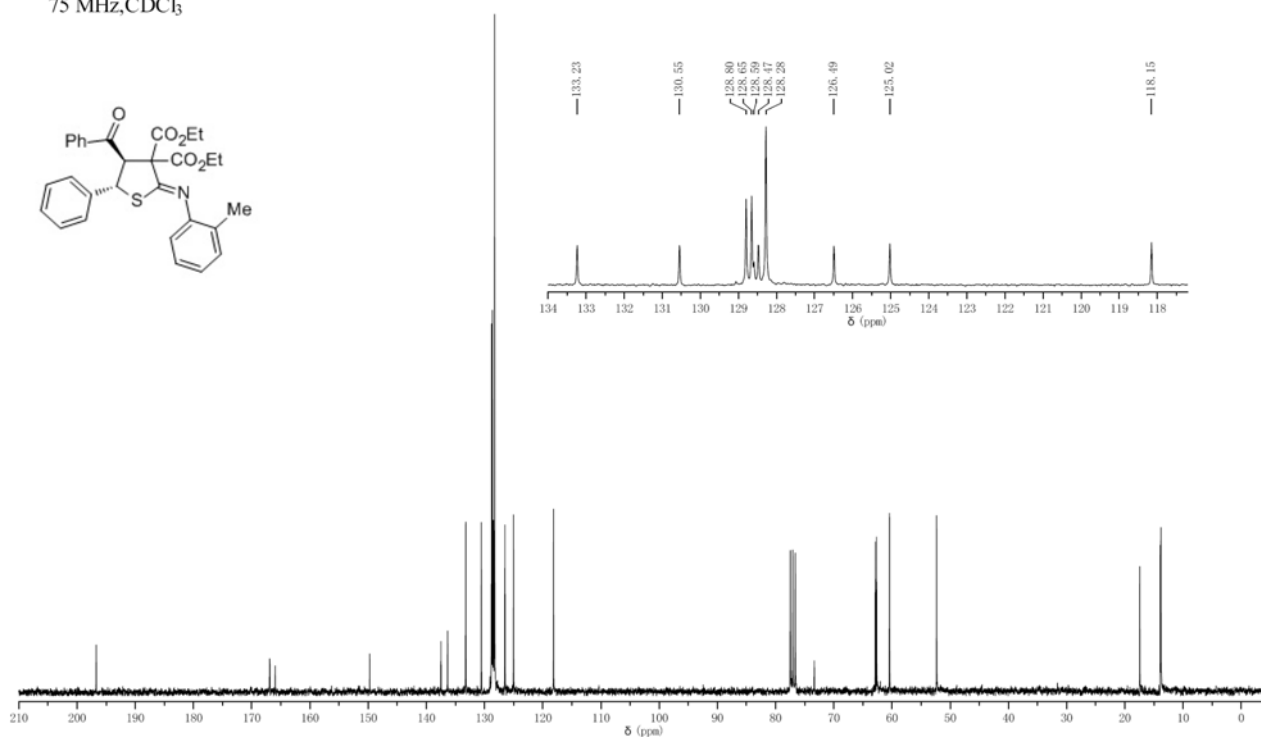



**Compound 3dd**

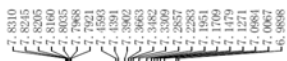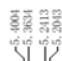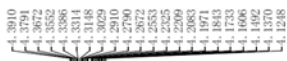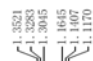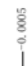

<sup>1</sup>H NMR  
300 MHz, CDCl<sub>3</sub>

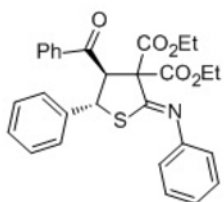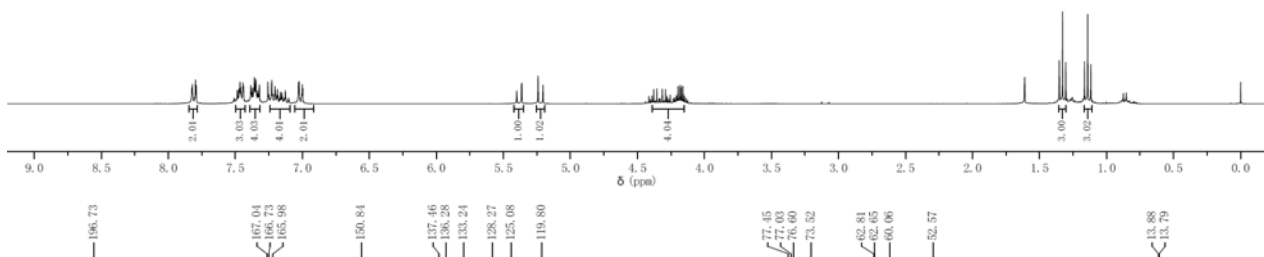

<sup>13</sup>C NMR  
75 MHz, CDCl<sub>3</sub>

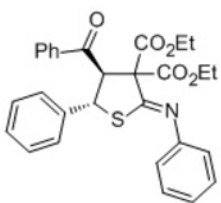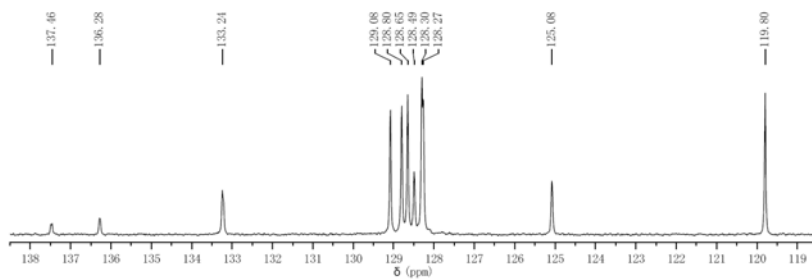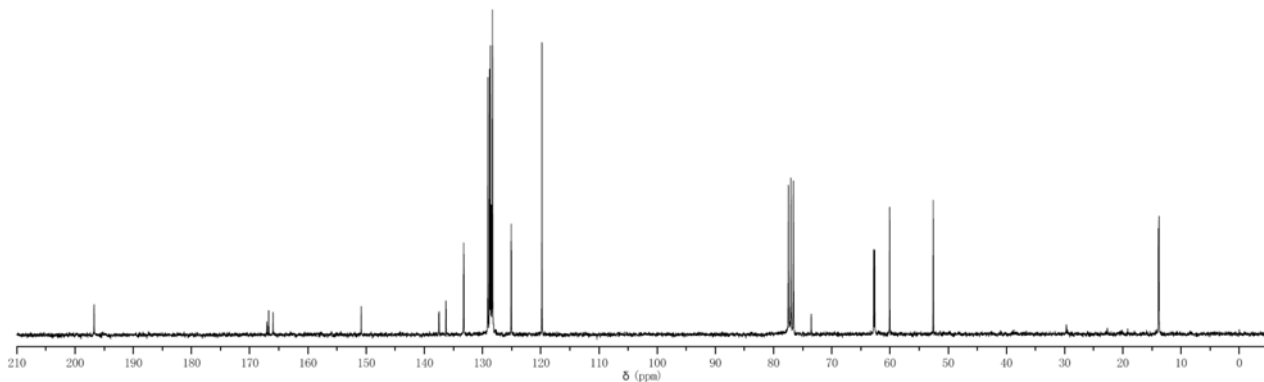

### Compound 3de

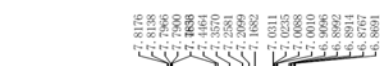

<sup>1</sup>H NMR  
300 MHz, CDCl<sub>3</sub>

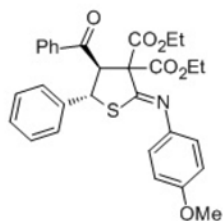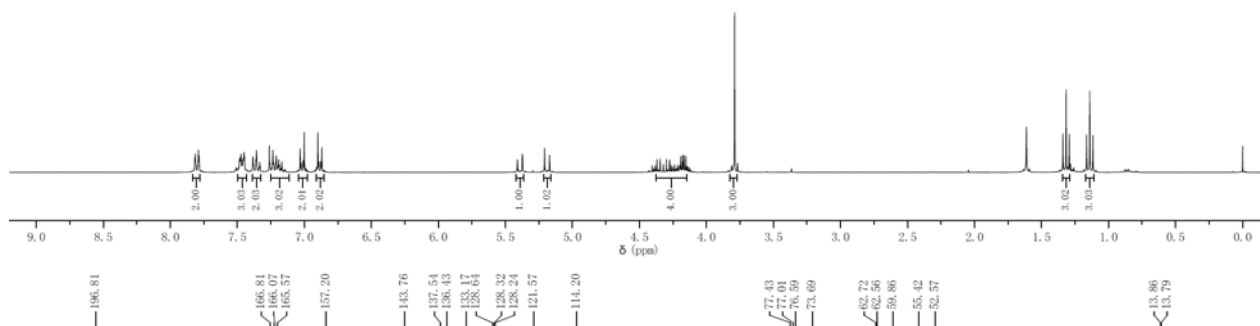

<sup>13</sup>C NMR  
75 MHz, CDCl<sub>3</sub>

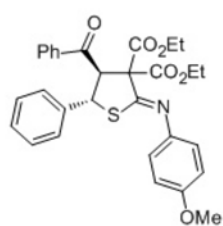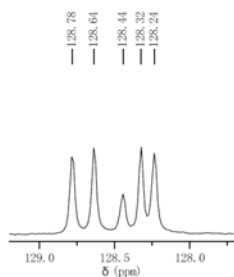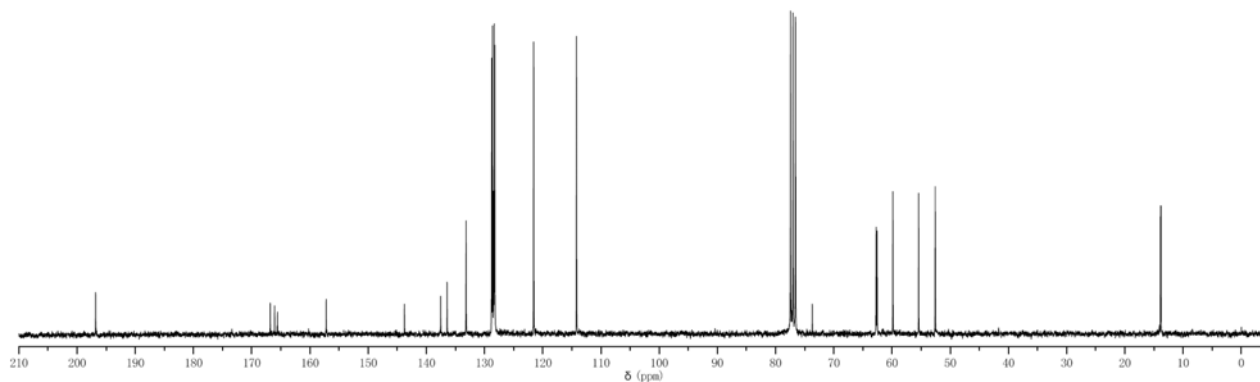

### Compound 3dh

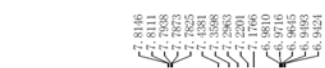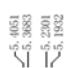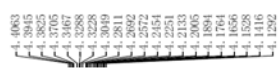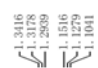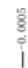

<sup>1</sup>H NMR  
300 MHz, CDCl<sub>3</sub>

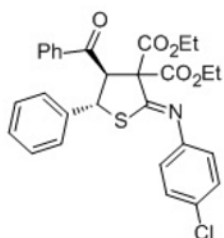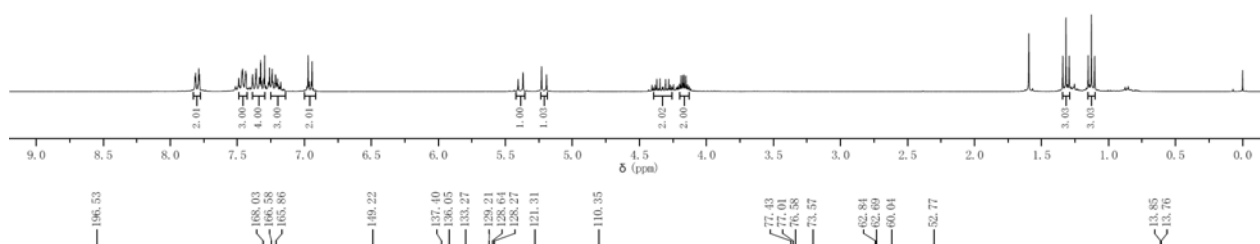

<sup>13</sup>C NMR  
75 MHz, CDCl<sub>3</sub>

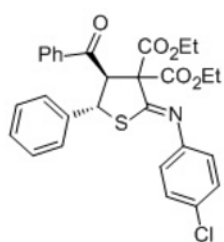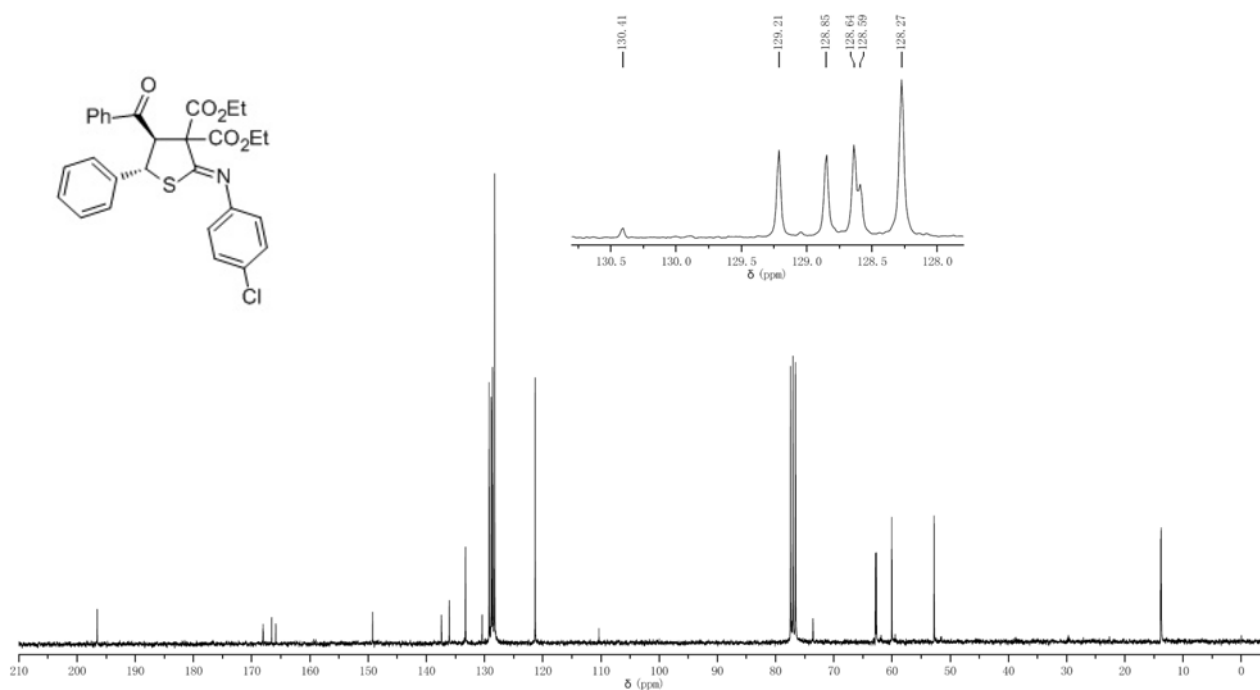

### Compound 3dk

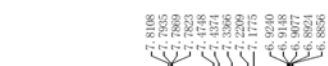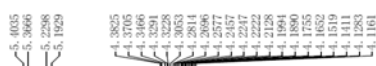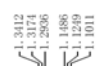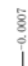

<sup>1</sup>H NMR  
 300 MHz, CDCl<sub>3</sub>

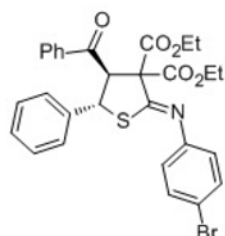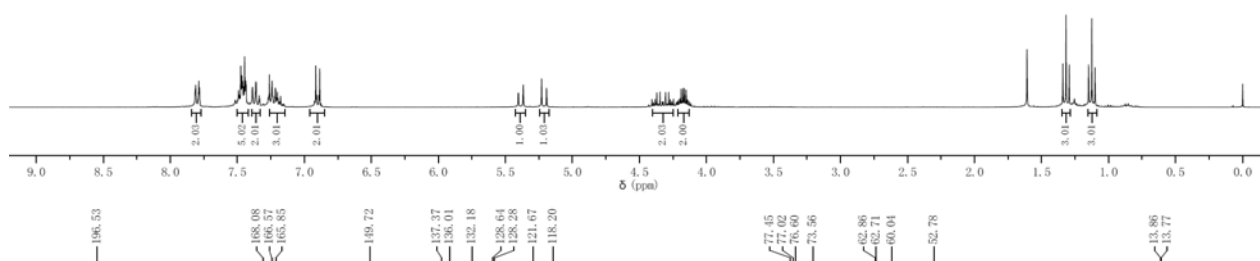

<sup>13</sup>C NMR  
 75 MHz, CDCl<sub>3</sub>

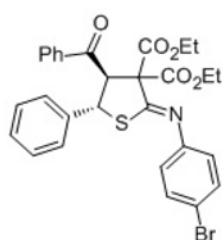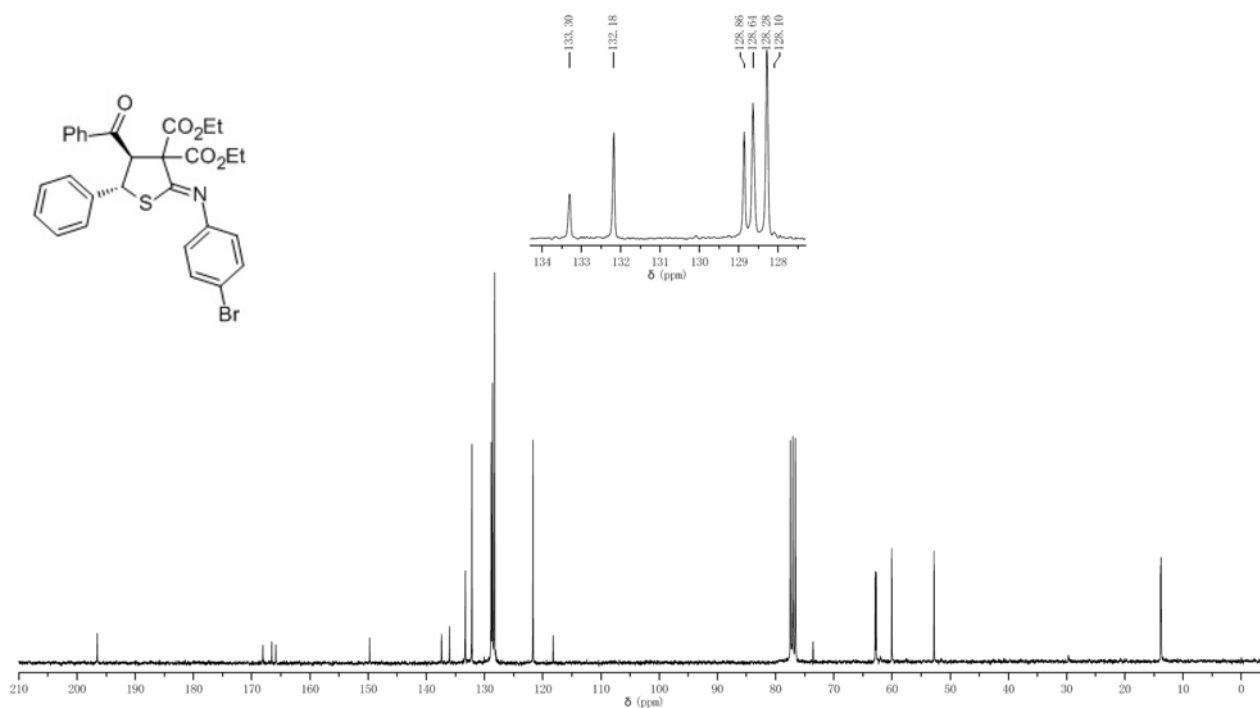

### Compound 3dl

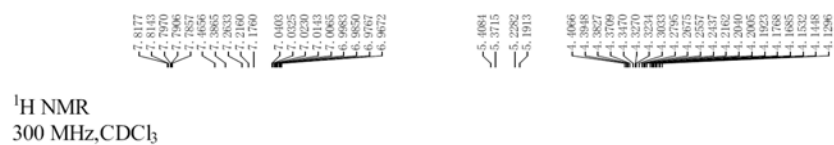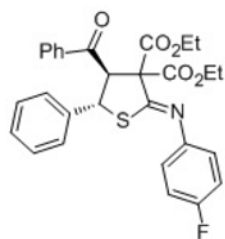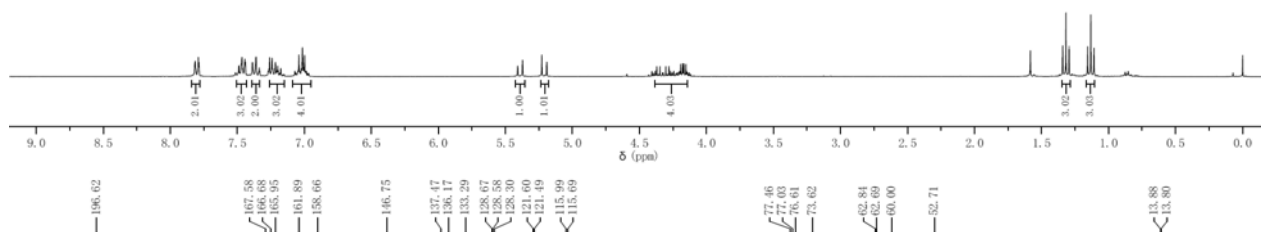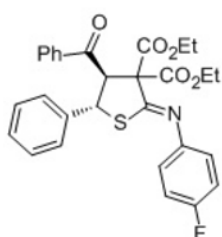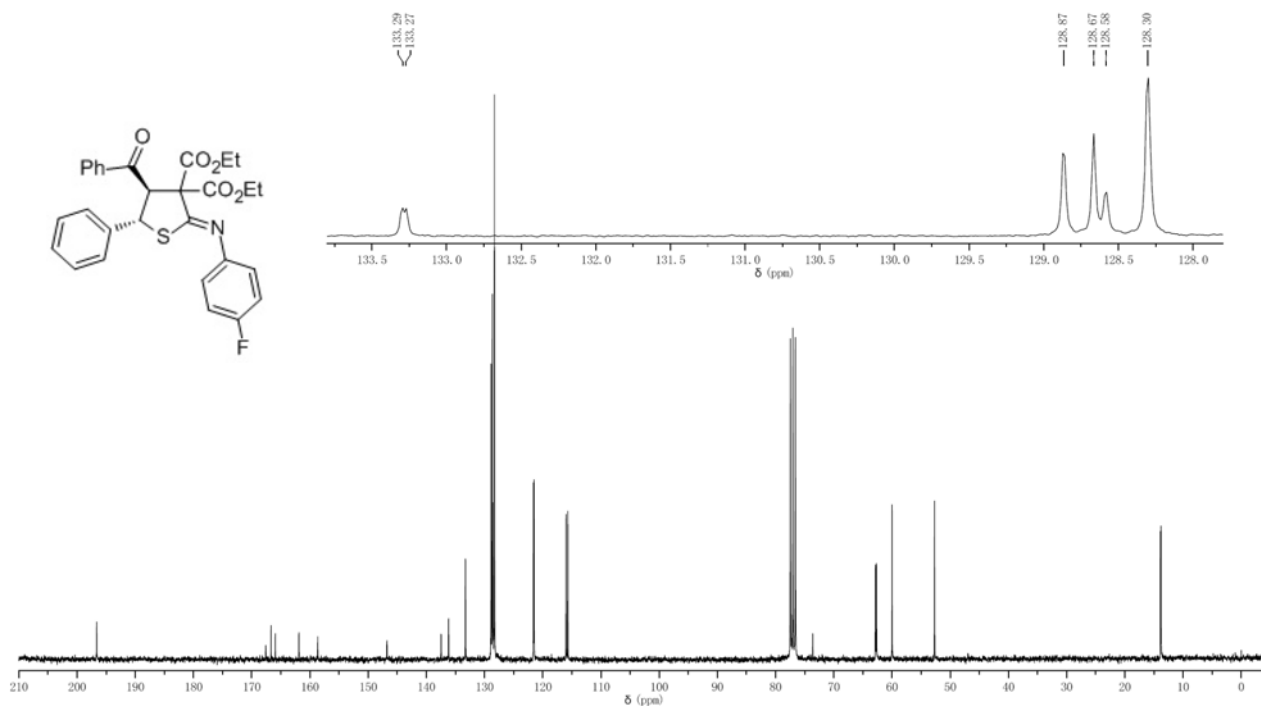

### Compound 3ea

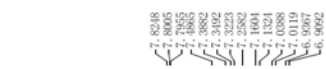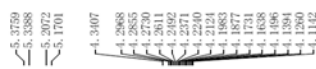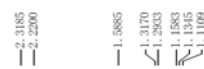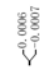

<sup>1</sup>H NMR  
300 MHz, CDCl<sub>3</sub>

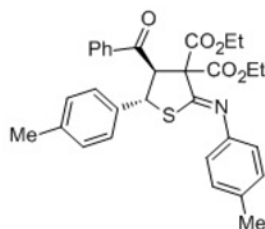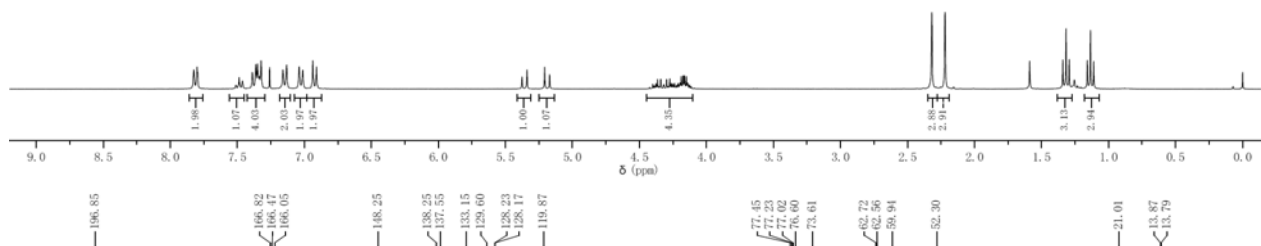

<sup>13</sup>C NMR  
75 MHz, CDCl<sub>3</sub>

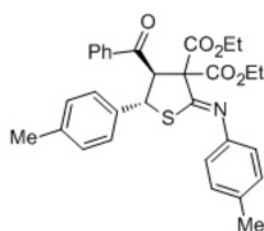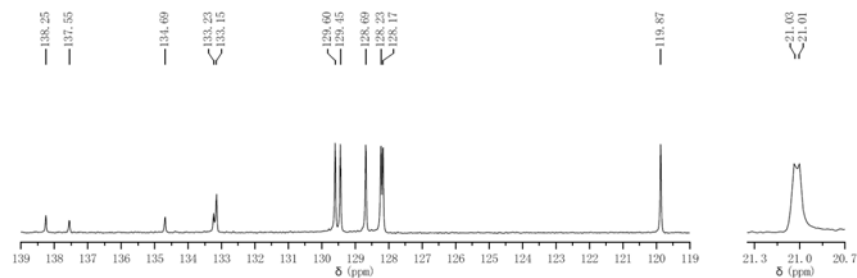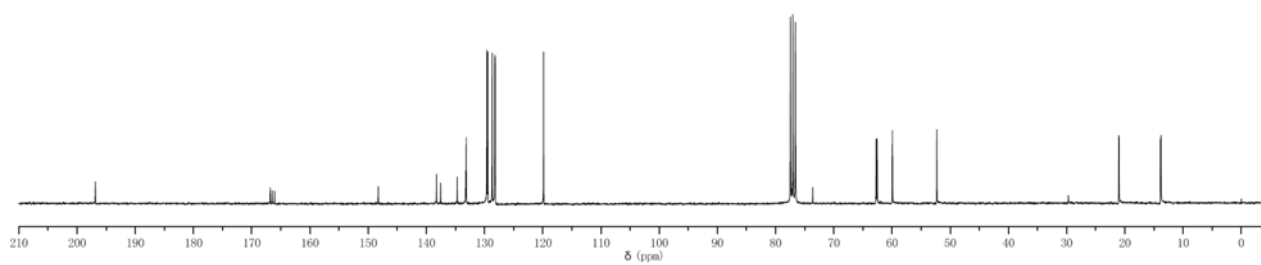

### Compound 4aa

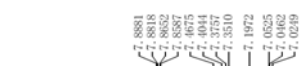

<sup>1</sup>H NMR  
 300 MHz, CDCl<sub>3</sub>

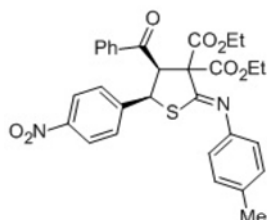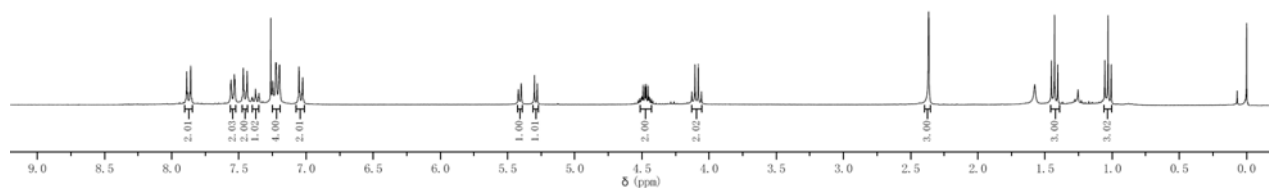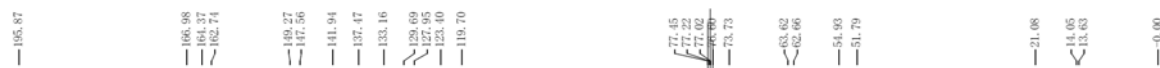

<sup>13</sup>C NMR  
 75 MHz, CDCl<sub>3</sub>

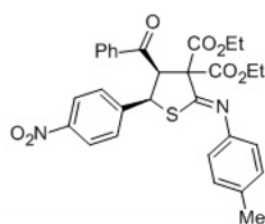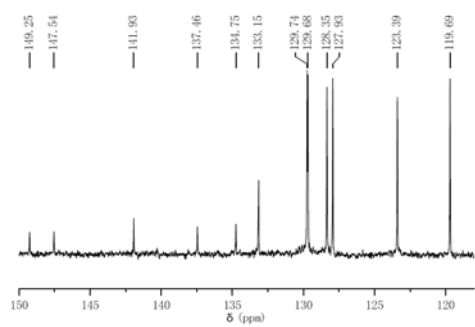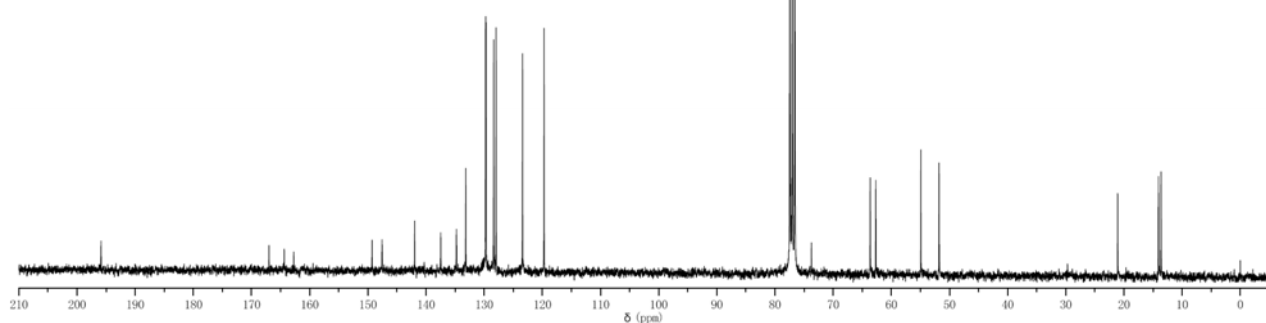

## X-ray crystallographic analysis of **3ck**

The single crystal of **3ck** suitable for X-ray crystallographic analysis was obtained by recrystallization from a mixed solvent of dichloromethane and petroleum ether. The single crystal X-ray diffraction data for the **3ck** was collected on a diffractometer with graphite monochromated Mo K $\alpha$  radiation ( $\lambda = 0.71073 \text{ \AA}$ ) at room temperature. Saint program and SADABS program carried out the data integration. The structure was solved by a direct method and refined on F<sup>2</sup> using SHELXTL suite of program. All non-hydrogen atoms were anisotropically refined by full-matrix least squares methods. All hydrogen atoms were geometrically generated and isotropically refined using a riding model. The details of the X-ray data collection, structure solution and structure refinements are given in Table S1. The crystal structure of **3ck** is given in Figure S1.

**Table S1** Crystallographic data and structural refinement details for compound **3ck**.

| Compound                                                | <b>3ck</b>                                            |
|---------------------------------------------------------|-------------------------------------------------------|
| Formula                                                 | C <sub>29</sub> H <sub>25</sub> BrClNO <sub>5</sub> S |
| Formula weight                                          | 614.92                                                |
| Temperature/K                                           | 293(2)                                                |
| Crystal system                                          | Triclinic                                             |
| Space group                                             | P-1                                                   |
| <i>a</i> , Å                                            | 9.740(1)                                              |
| <i>b</i> , Å                                            | 12.565(1)                                             |
| <i>c</i> , Å                                            | 13.024(1)                                             |
| $\alpha$ , deg                                          | 90.176(1)                                             |
| $\beta$ , deg                                           | 108.720(1)                                            |
| $\gamma$ , deg                                          | 109.614(1)                                            |
| <i>V</i> / Å <sup>3</sup>                               | 1411.1(2)                                             |
| <i>Z</i>                                                | 2                                                     |
| $\mu$ (Mo K $\alpha$ ), mm <sup>-1</sup>                | 1.664                                                 |
| $\theta$ range for data collection, deg                 | 1.7 to 27.6                                           |
| Calculated density/(g·cm <sup>-3</sup> )                | 1.447                                                 |
| Reflections collected                                   | 12325                                                 |
| Unique reflections/R <sub>int</sub>                     | 6387 / R(int) = 0.022                                 |
| <i>F</i> (000)                                          | 628                                                   |
| Goodness-of-fit on F <sup>2</sup>                       | 0.98                                                  |
| Crystal dimension/mm <sup>3</sup>                       | 0.18×0.22×0.28                                        |
| R, R <sub>w</sub> [ <i>I</i> > 2 $\sigma$ ( <i>I</i> )] | 0.0709, 0.2751                                        |
| Residual $\rho$ /(e·Å <sup>-3</sup> )                   | 1.39, -0.65                                           |



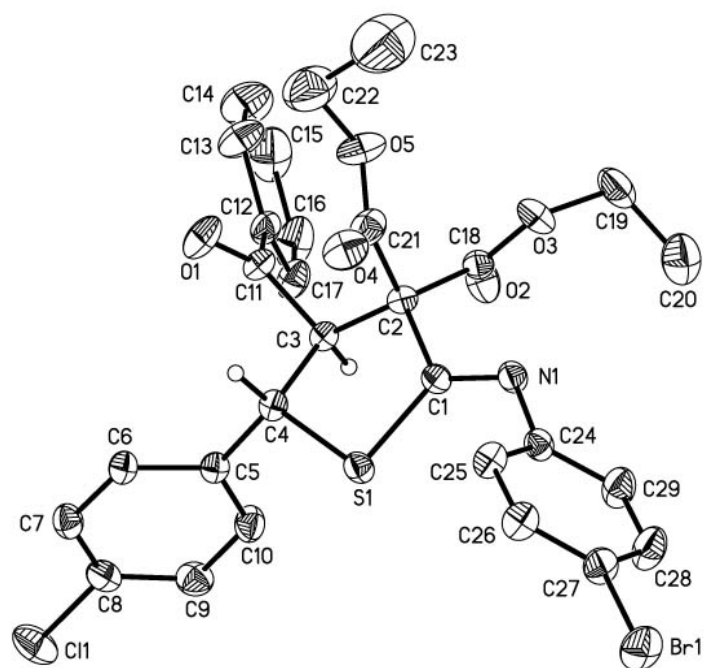

**Figure S1** X-ray structure (50 % probability ellipsoids) of **3ck**.
